# Supplementary material for: Au/UiO-66-Zr nanohybrids: boosting the yield rates of electrochemical ammonia synthesis with the sacrificial effects of faradaic efficiencies
Source: Royal Society of Chemistry journal article supplement (doi:10.1039/d3qi01021j), 2023-01-01
Supplement: d3qi01021j1.pdf [file d3qi01021j1.pdf]

## Supporting Information

### **Au/UiO-66-Zr nanohybrids: Boosting yield rates of electrochemical ammonia synthesis at sacrifice of Faradaic efficiencies**

Xiaoyu Qian <sup>a†</sup>, Lu Ding <sup>a†</sup>, Yanling Zhao <sup>a</sup>, Zhichun Li <sup>a</sup>, Yuanxiu Liao <sup>a</sup>, Jiabin Tan <sup>b</sup> and Xiaobo He <sup>a\*</sup>

<sup>a</sup> Jiangsu Key Laboratory of Advanced Catalytic Materials and Technology, School of Petrochemical Engineering, Changzhou University, Changzhou 213164, P.R. China

<sup>b</sup> College of Chemical Engineering, Beijing University of Chemical Technology, Beijing 100029, P.R. China

\*Corresponding author

Tel.: +86-519-86330253

E-mail: hexiaobo@cczu.edu.cn

† These authors contributed equally.

## Supporting Figures.

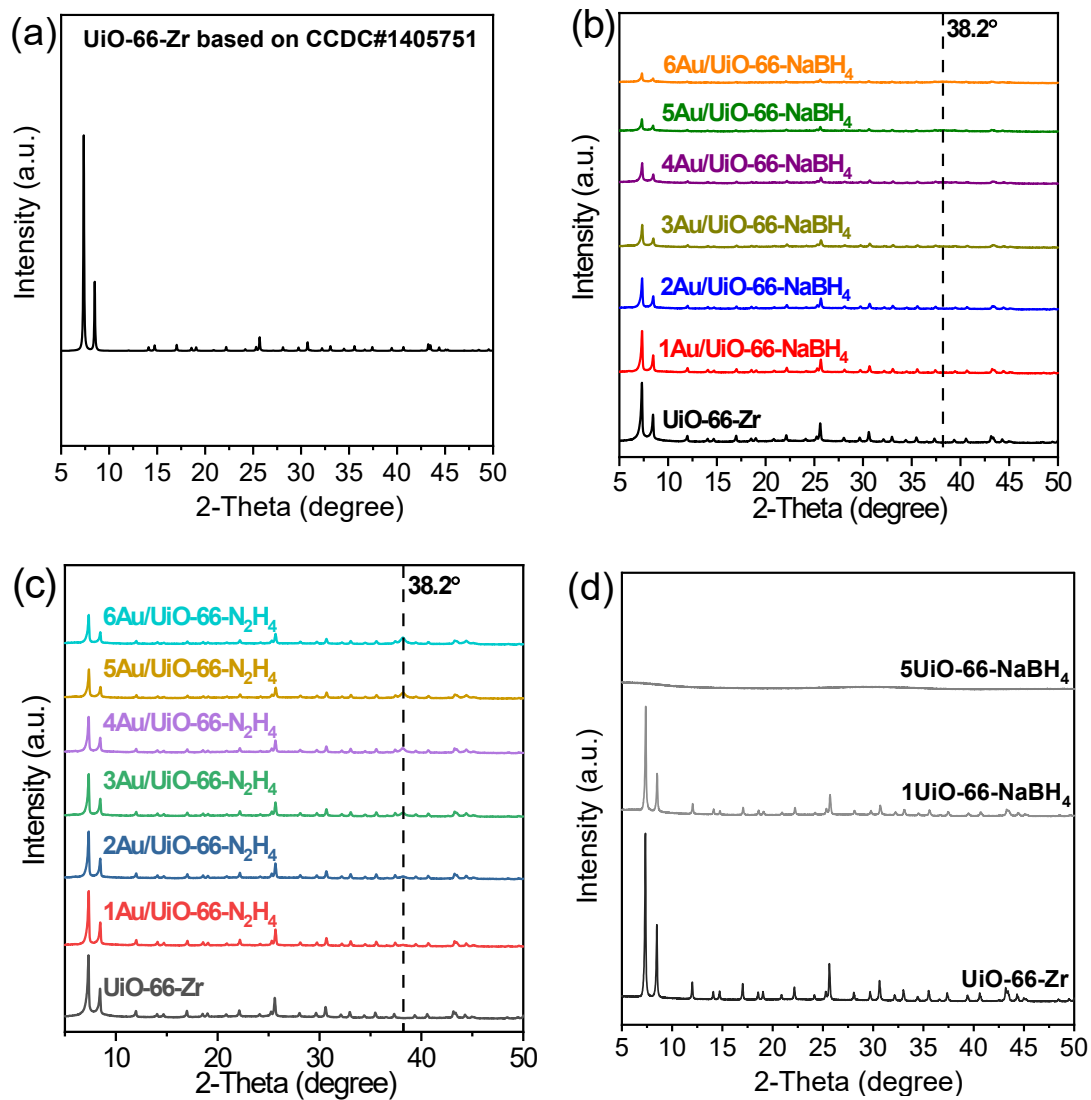

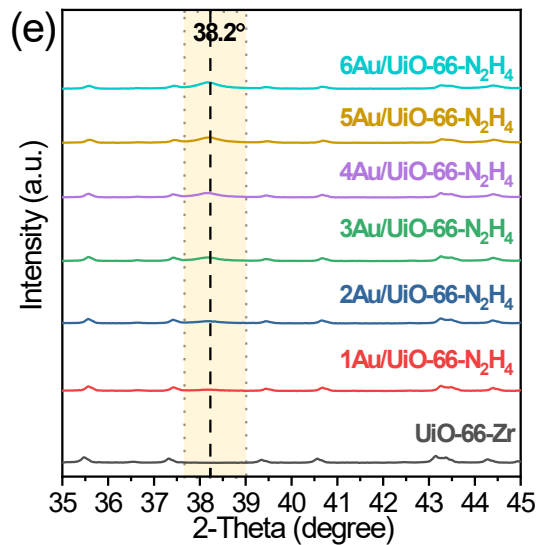

**Fig. S1. XRD patterns:** (a) Simulated one of UiO-66-Zr on the basis of the structure of CCDC#1405751; (b) The prepared pristine UiO-66-Zr and  $x$ Au/UiO-66-NaBH<sub>4</sub>; (c)  $x$ Au/UiO-66-N<sub>2</sub>H<sub>4</sub>; (d) The pristine UiO-66-Zr, 1UiO-66-NaBH<sub>4</sub> and 5UiO-66-NaBH<sub>4</sub>, in which 1UiO-66-NaBH<sub>4</sub> and 5UiO-66-NaBH<sub>4</sub> are the pristine UiO-66-Zr treated by 1 mL and 5 mL of 0.5 M NaBH<sub>4</sub> solution (the solvent was a mixture of anhydrous ethanol and ultrapure water with a volume ratio of 1:1), respectively; (e) Zoomed in ones of the pristine UiO-66-Zr and  $x$ Au/UiO-66-N<sub>2</sub>H<sub>4</sub>.

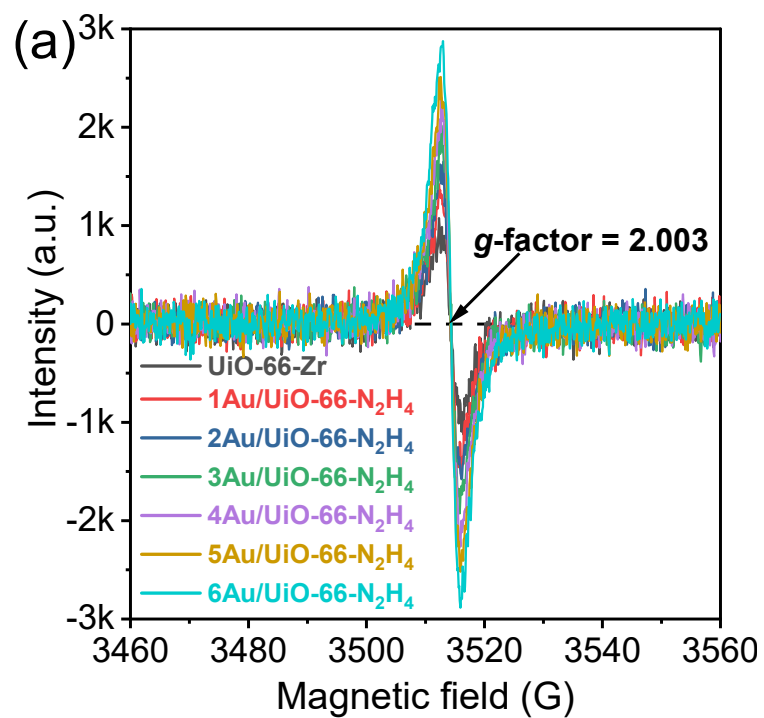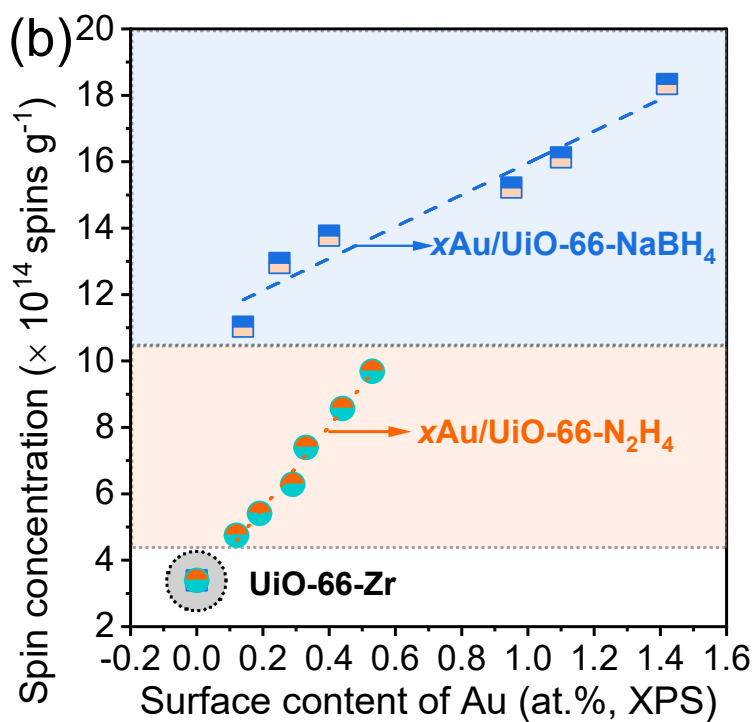

**Fig. S2.** (a) ESR of UiO-66-Zr and  $x$ Au/UiO-66-N<sub>2</sub>H<sub>4</sub>; (b) Relationships between surface contents of Au and spin concentrations for both  $x$ Au/UiO-66-NaBH<sub>4</sub> and  $x$ Au/UiO-66-N<sub>2</sub>H<sub>4</sub>.

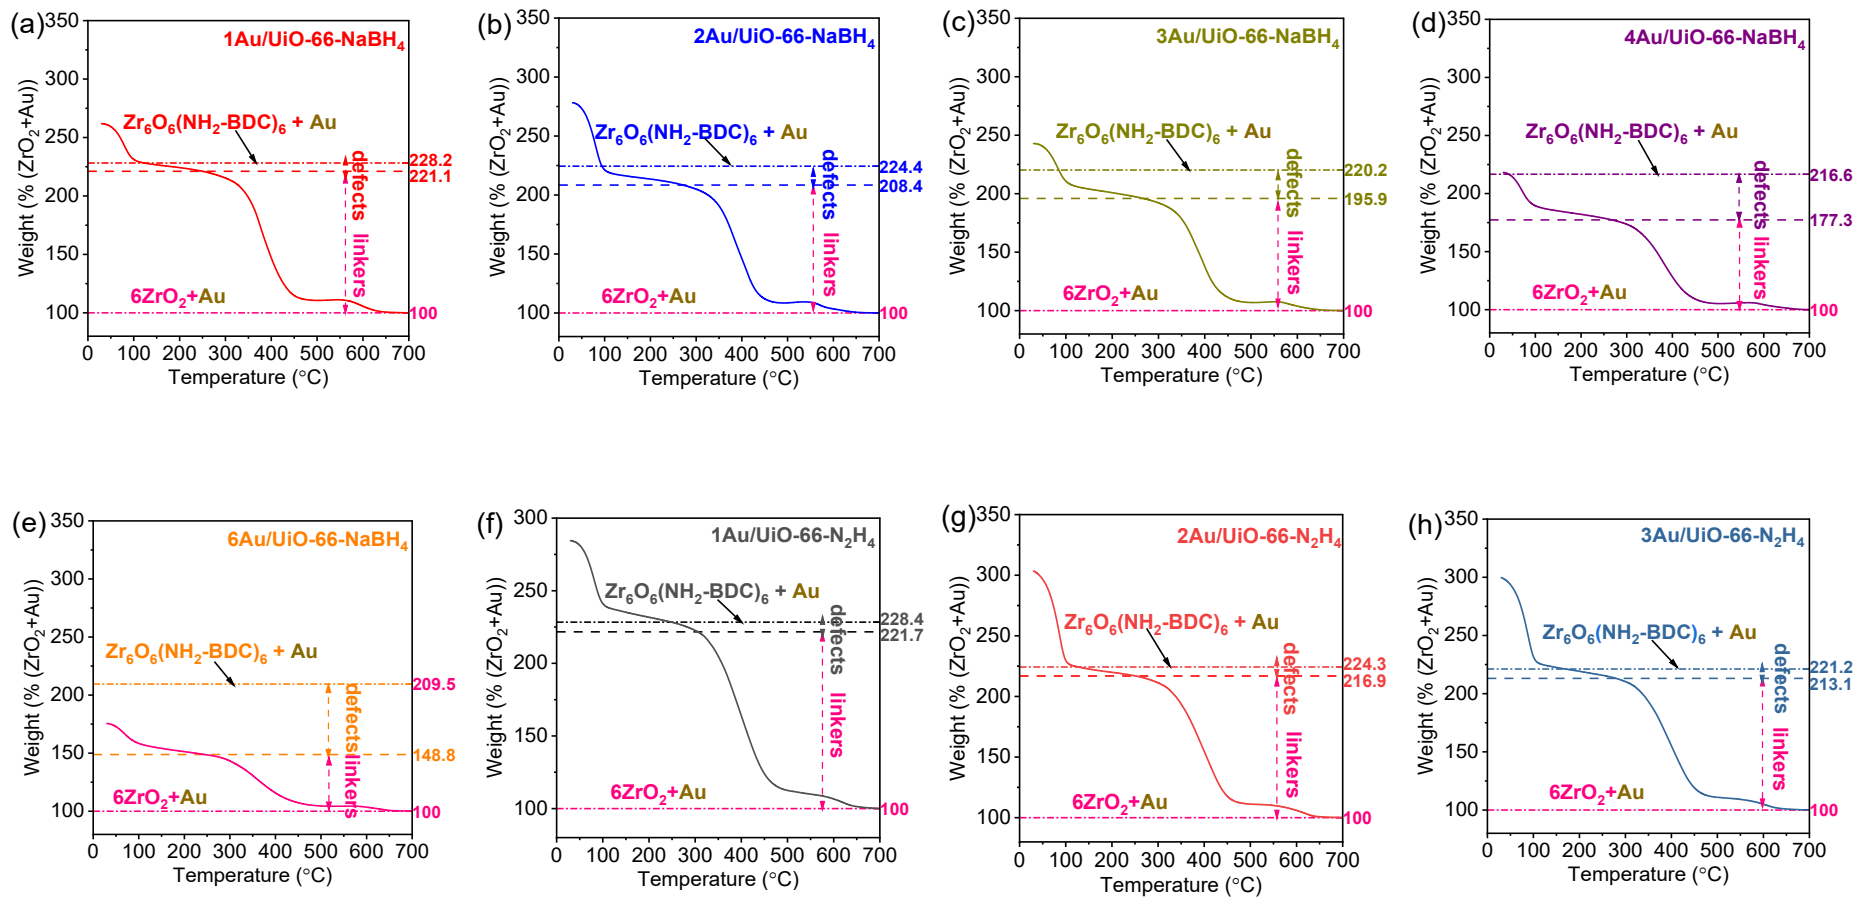

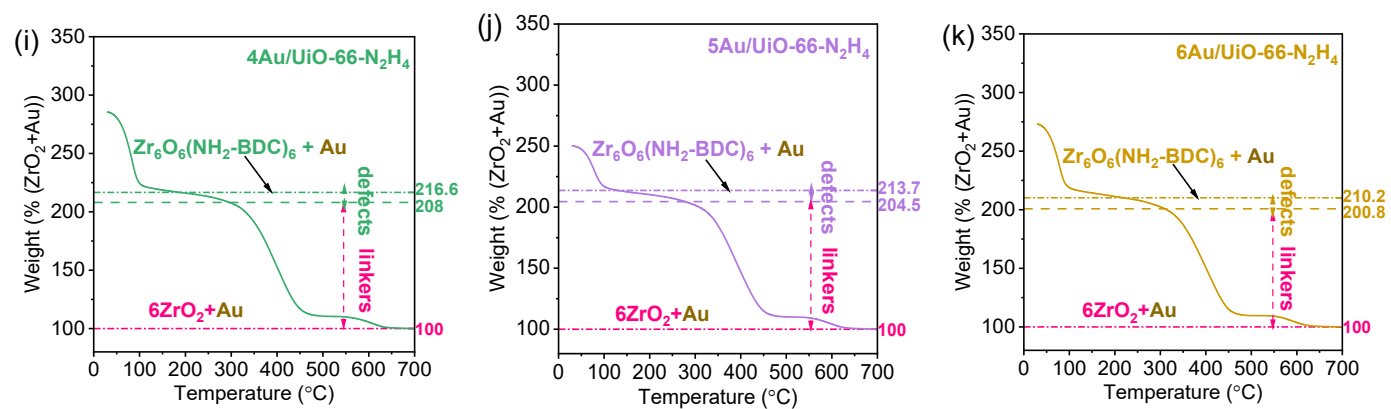

**Fig. S3.** TG curves in air of  $x\text{Au}/\text{UiO-66-NaBH}_4$  ( $x = 1$  (a), 2 (b), 3 (c), 4 (d), and 6 (e)) and  $x\text{Au}/\text{UiO-66-N}_2\text{H}_4$  ( $x = 1$  (f), 2 (g), 3 (h), 4 (i), 5 (j), and 6 (k)).

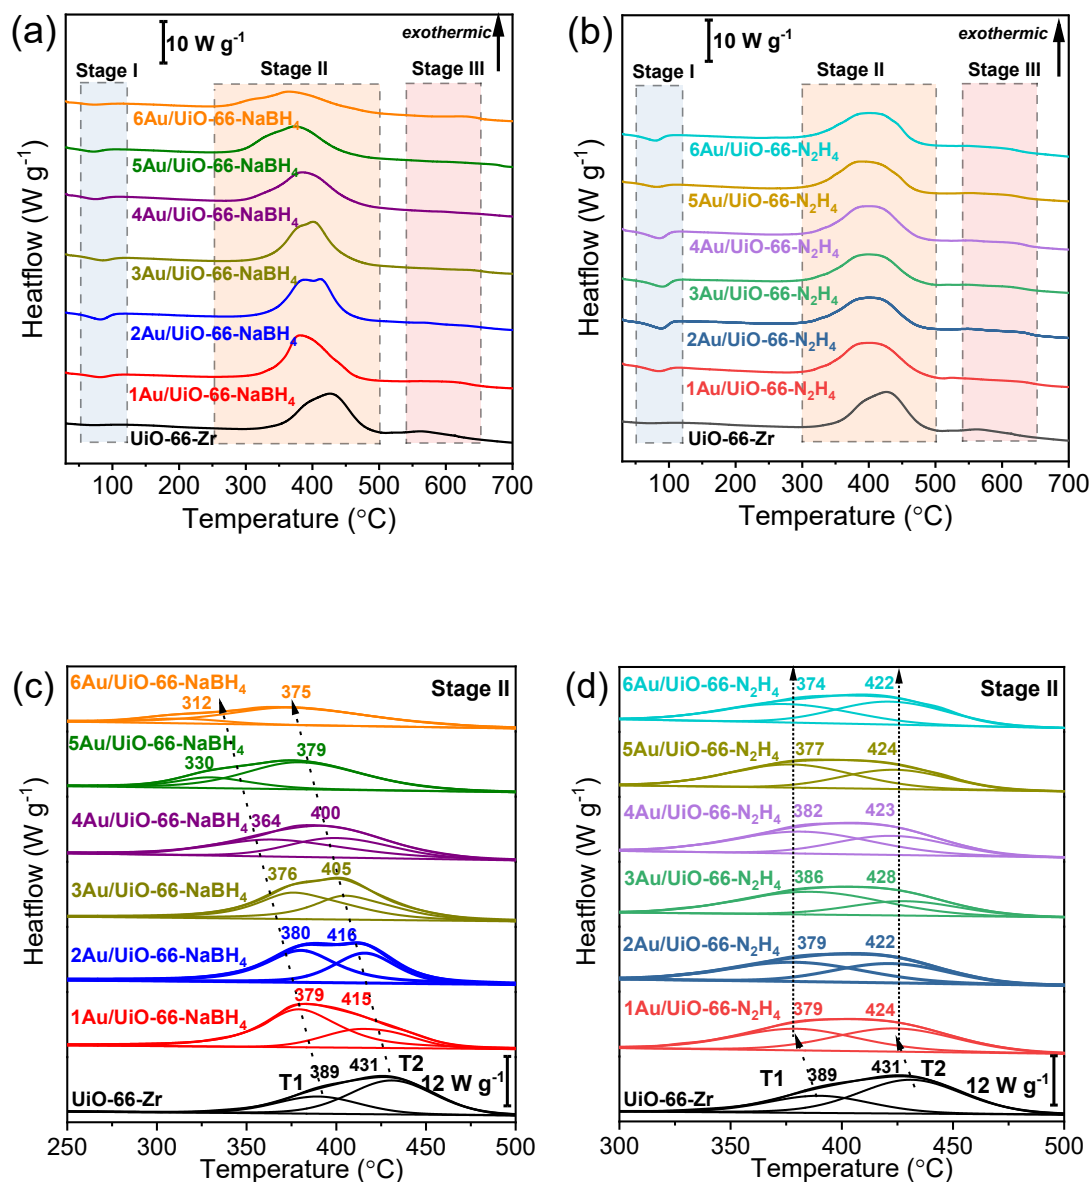

**Fig. S4.** DSC curves in air: (a) The pristine UiO-66-Zr and  $x$ Au/UiO-66-NaBH<sub>4</sub>; (b) The pristine UiO-66-Zr and  $x$ Au/UiO-66-N<sub>2</sub>H<sub>4</sub>; (c) Stage II of the pristine UiO-66-Zr and  $x$ Au/UiO-66-NaBH<sub>4</sub>; (d) Stage II of the pristine UiO-66-Zr and  $x$ Au/UiO-66-N<sub>2</sub>H<sub>4</sub>.





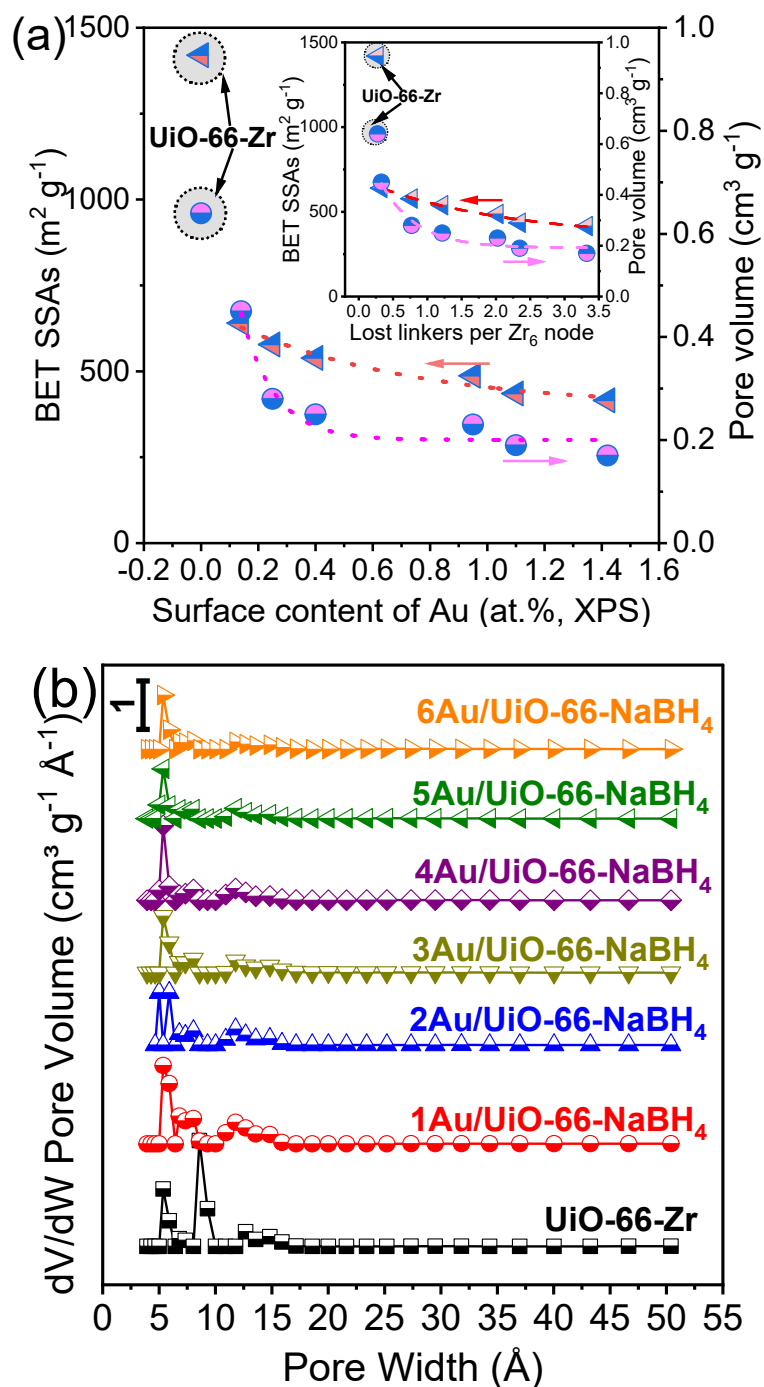

**Fig. S5. Porosity for  $x\text{Au}/\text{UiO-66-NaBH}_4$ :** (a) Relationship between surface contents of Au and BET SSAs, and that between surface contents of Au and pore volumes, and the inset shows relationship between lost linkers per  $\text{Zr}_6$  node and BET SSAs, and that between lost linkers per  $\text{Zr}_6$  node and pore volumes; (b) Pore size distributions.

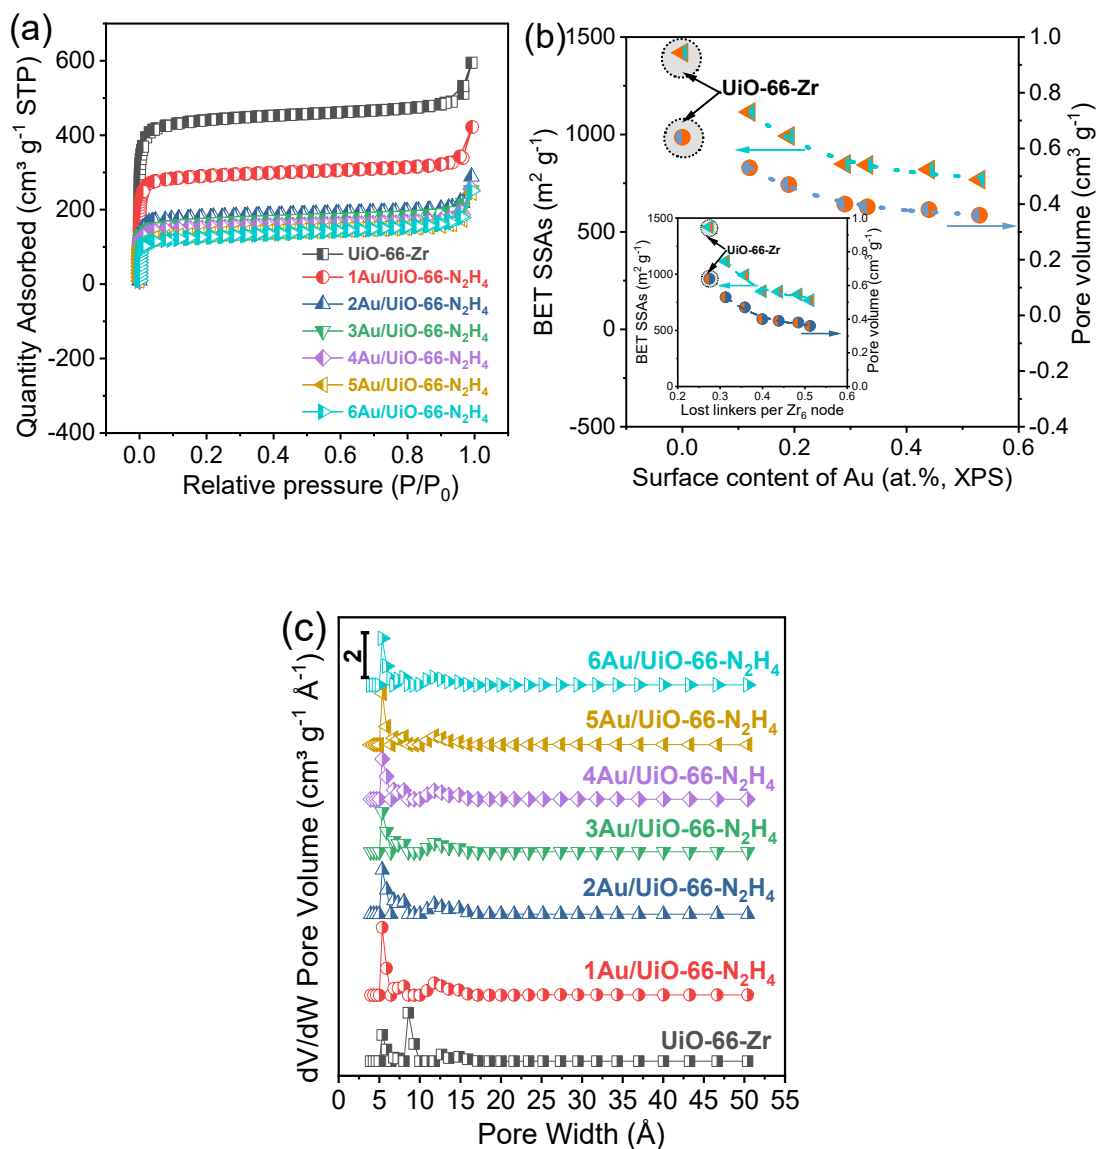

**Fig. S6. Porosity for  $x\text{Au}/\text{UiO}-66-\text{N}_2\text{H}_4$ :** (a)  $\text{N}_2$ -sorption isotherms at 77 K of the pristine  $\text{UiO}-66-\text{Zr}$  and  $x\text{Au}/\text{UiO}-66-\text{N}_2\text{H}_4$ ; (b) Relationship between surface contents of Au and BET SSAs, and that between surface contents of Au and pore volumes, and the inset shows relationship between lost linkers per  $\text{Zr}_6$  node and BET SSAs, and that between lost linkers per  $\text{Zr}_6$  node and pore volumes; (c) Pore size distributions.

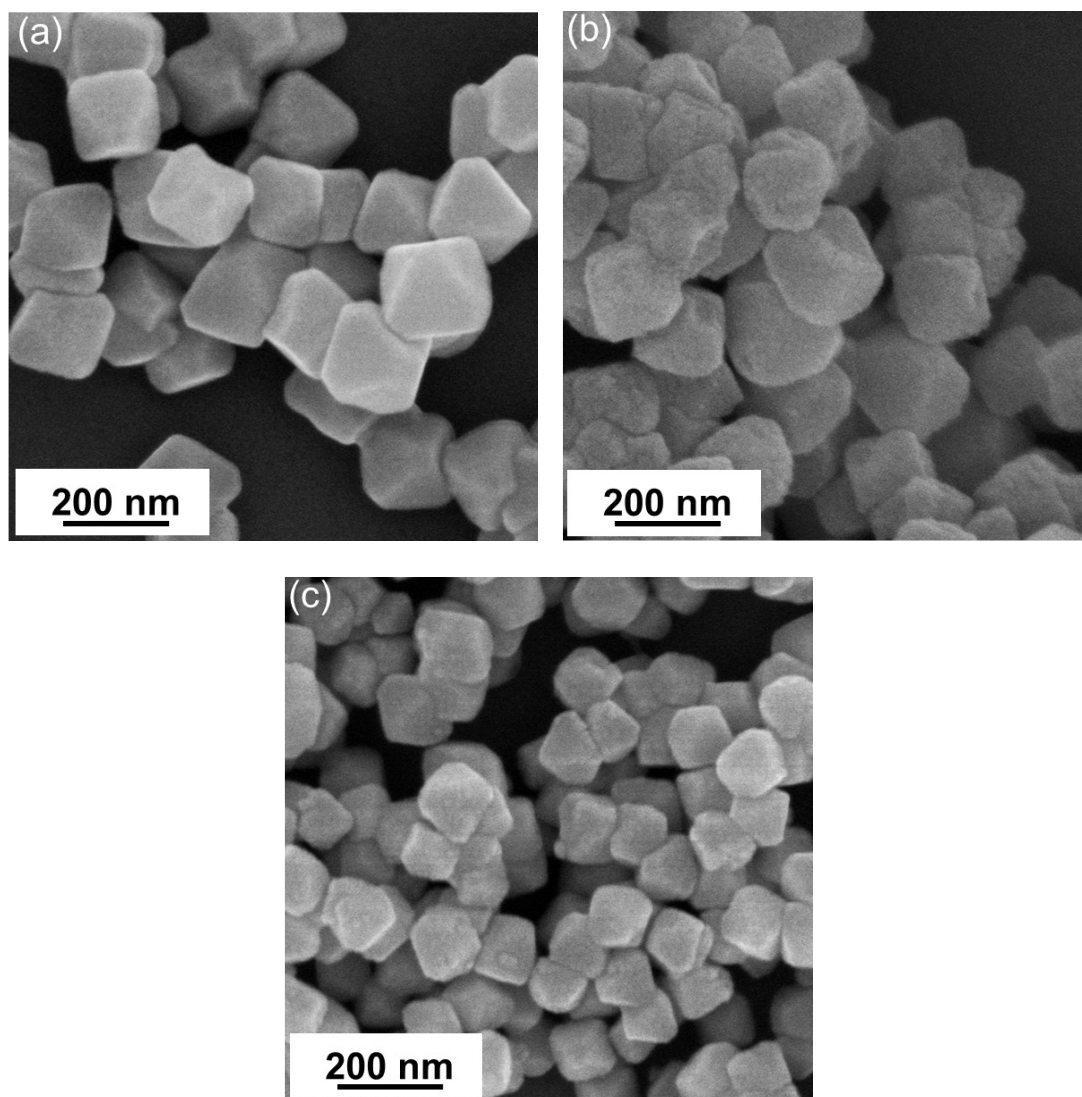

**Fig. S7. SEM images:** (a) The pristine UiO-66-Zr; (b) 1UiO-66-NaBH<sub>4</sub>; (c) 5UiO-66-NaBH<sub>4</sub>.

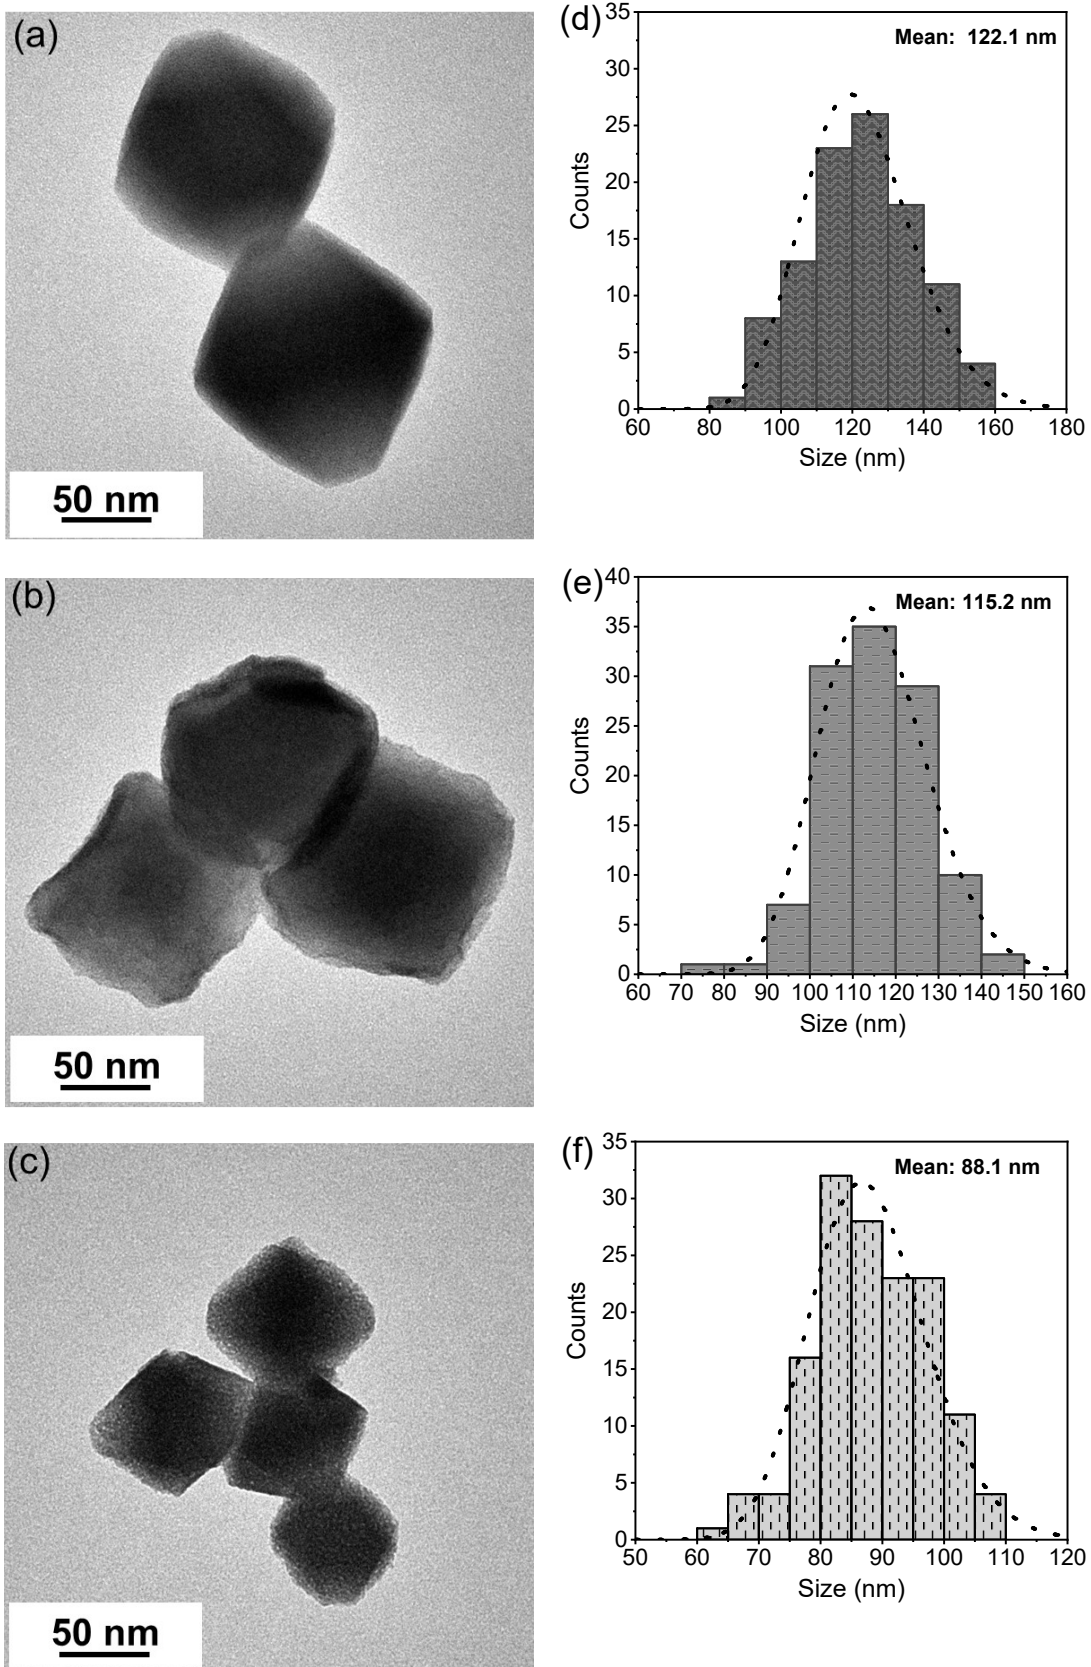

**Fig. S8. TEM images and size distributions:** (a) The pristine UiO-66-Zr; (b) 1UiO-

66-NaBH<sub>4</sub>; (c) 5UiO-66-NaBH<sub>4</sub>; (d) Side length distribution of octahedral pristine UiO-66-Zr nanoparticles; (e) Side length distribution of octahedral 1UiO-66-NaBH<sub>4</sub> nanoparticles; (f) Side length distribution of octahedral 5UiO-66-NaBH<sub>4</sub> nanoparticles.

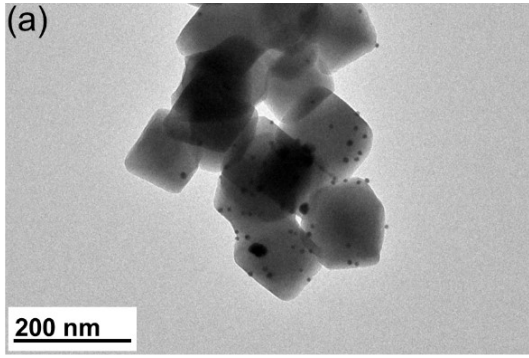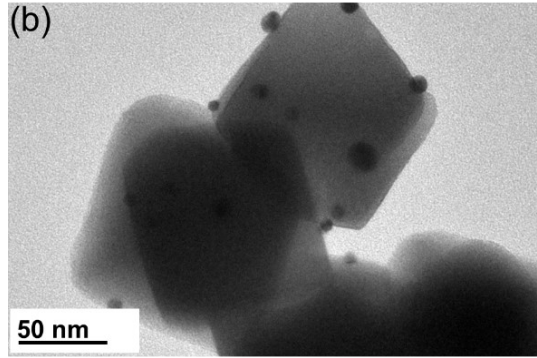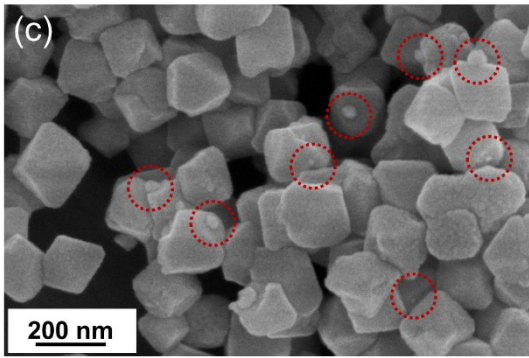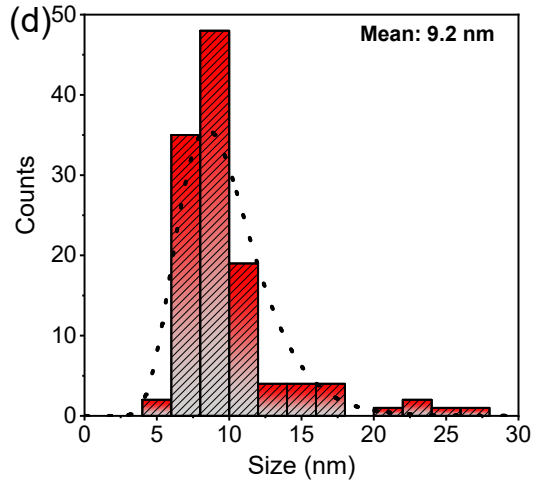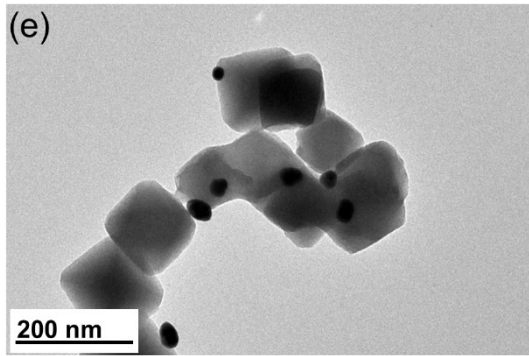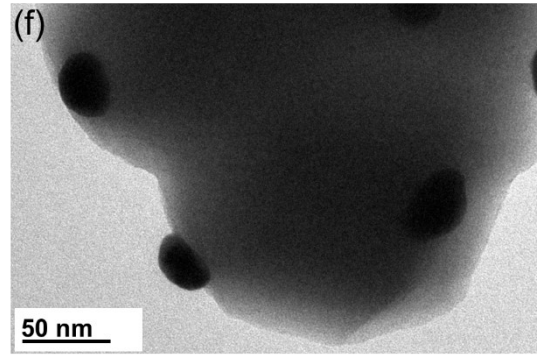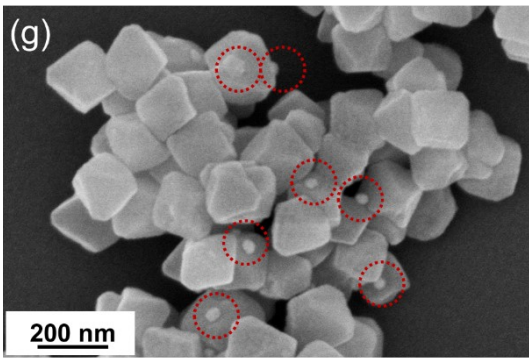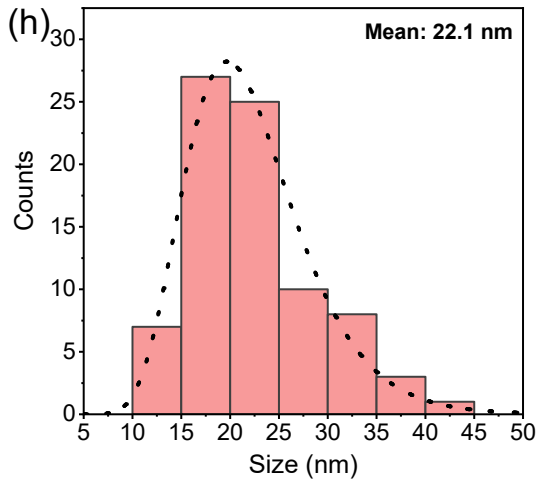

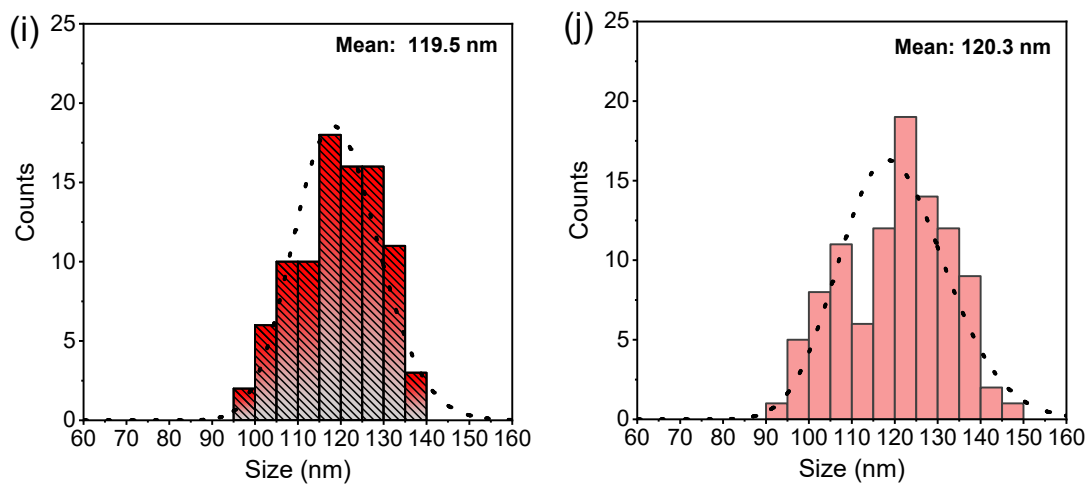

**Fig. S9. TEM and SEM images and size distributions of Au and UiO-66-Zr support nanoparticles for other samples:** (a) and (b) TEM images of 1Au/UiO-66-NaBH<sub>4</sub>; (c) SEM image of 1Au/UiO-66-NaBH<sub>4</sub>, in which some Au nanoparticles are marked by red dotted circles; (d) Corresponding size distributions of Au nanoparticles in 1Au/UiO-66-NaBH<sub>4</sub>; (e) and (f) TEM images of 1Au/UiO-66-N<sub>2</sub>H<sub>4</sub>; (g) SEM image of 1Au/UiO-66-N<sub>2</sub>H<sub>4</sub>, in which some Au nanoparticles are marked by red dotted circles; (h) Corresponding size distributions of Au nanoparticles in 1Au/UiO-66-N<sub>2</sub>H<sub>4</sub>; (i) Side length distribution of octahedral UiO-66-Zr support nanoparticles in 1Au/UiO-66-NaBH<sub>4</sub>; (j) Side length distribution of octahedral UiO-66-Zr support nanoparticles in 1Au/UiO-66-N<sub>2</sub>H<sub>4</sub>.

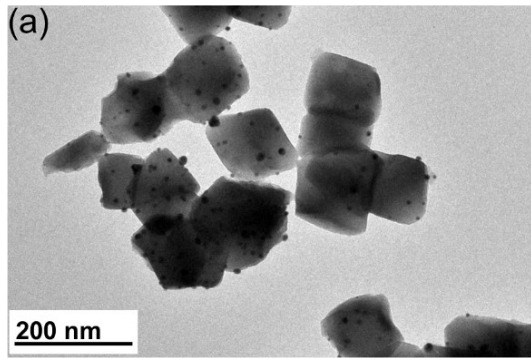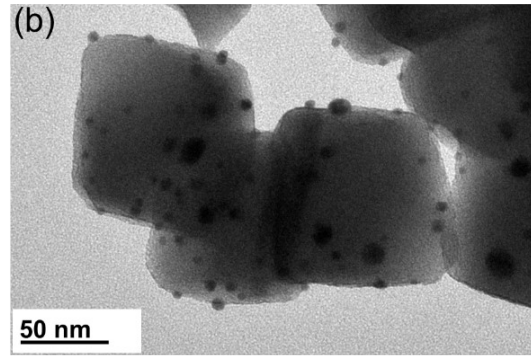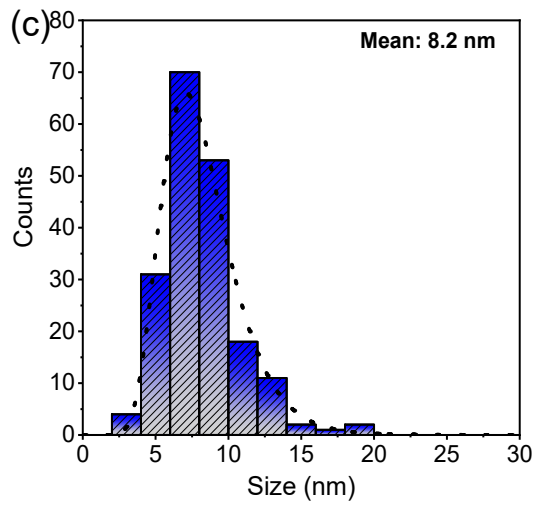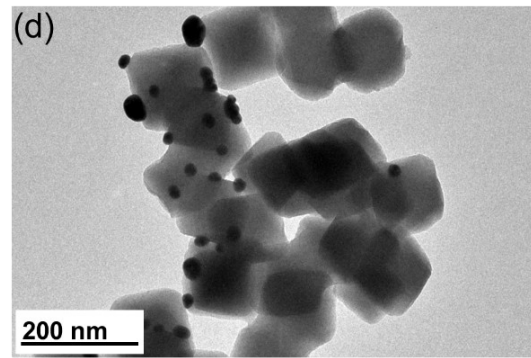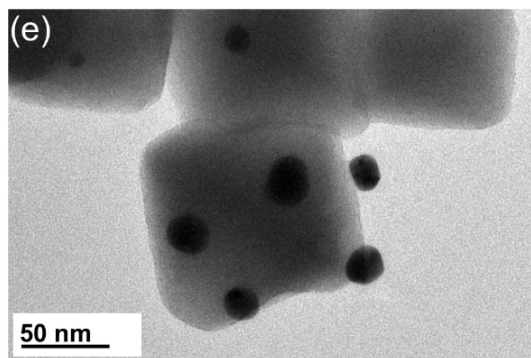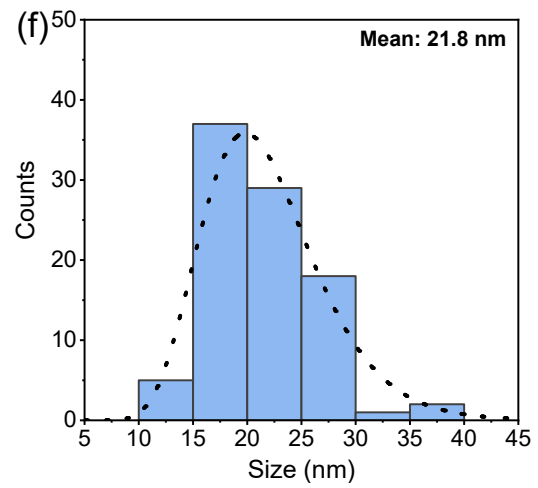



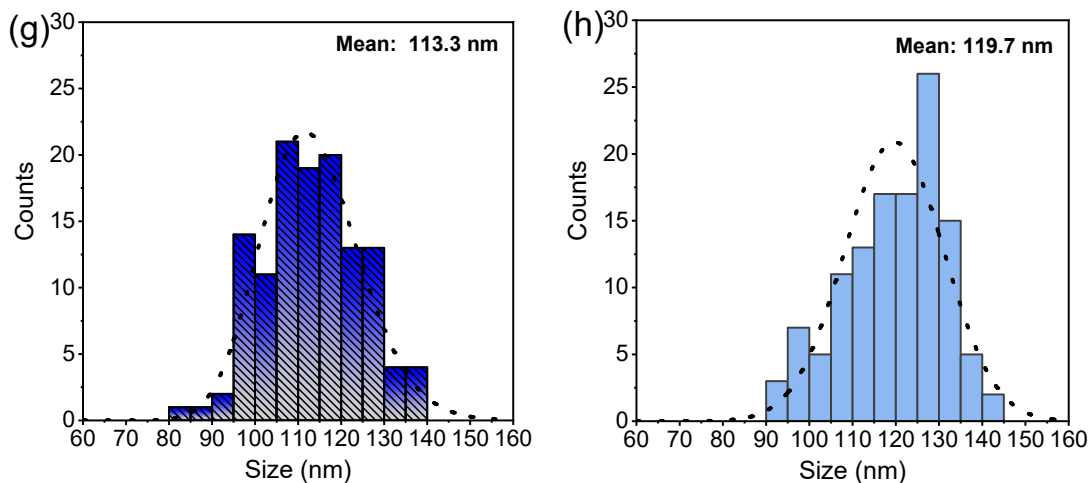

**Fig. S10. TEM and SEM images and size distributions of Au and UiO-66-Zr support nanoparticles for other samples:** (a) and (b) 2Au/UiO-66-NaBH<sub>4</sub>; (c) Corresponding size distributions of Au nanoparticles in 2Au/UiO-66-NaBH<sub>4</sub>; (d) and (e) 2Au/UiO-66-N<sub>2</sub>H<sub>4</sub>; (f) Corresponding size distributions of Au nanoparticles in 2Au/UiO-66-N<sub>2</sub>H<sub>4</sub>; (g) Side length distribution of octahedral UiO-66-Zr support nanoparticles in 2Au/UiO-66-NaBH<sub>4</sub>; (h) Side length distribution of octahedral UiO-66-Zr support nanoparticles in 2Au/UiO-66-N<sub>2</sub>H<sub>4</sub>.

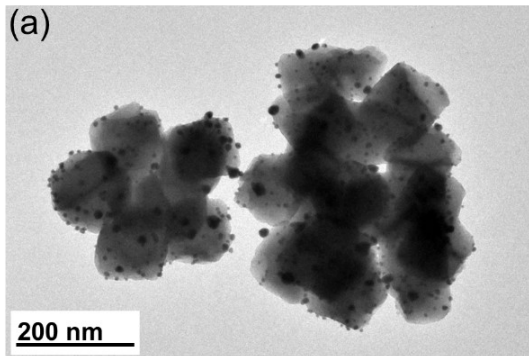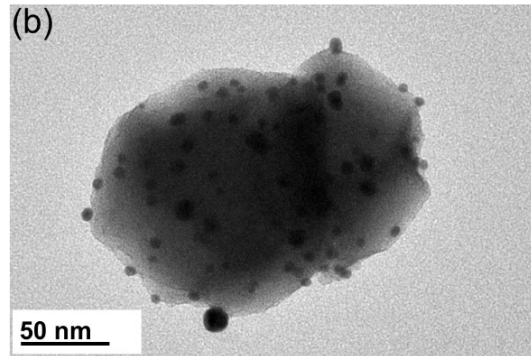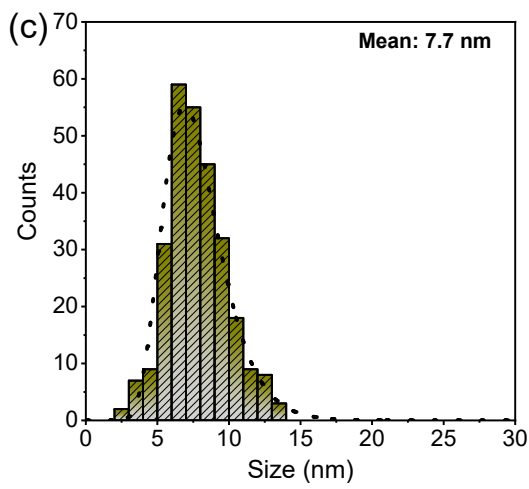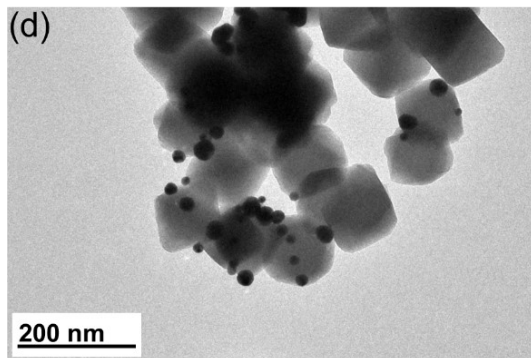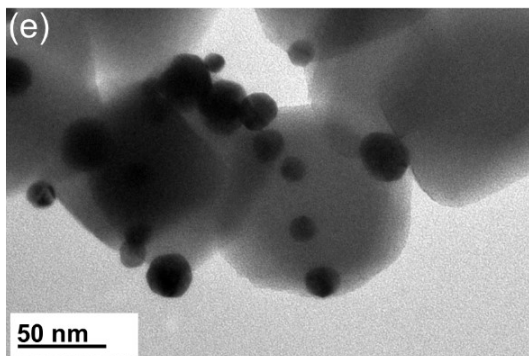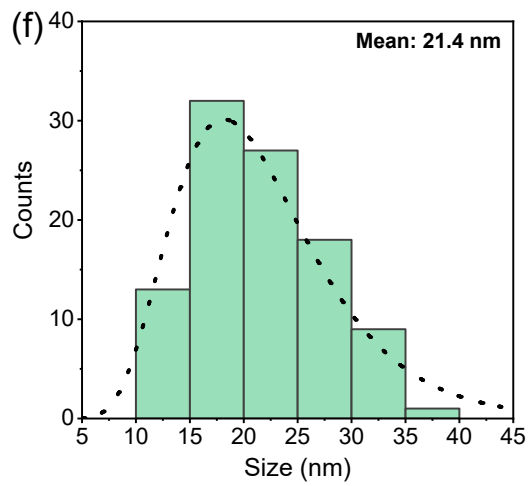

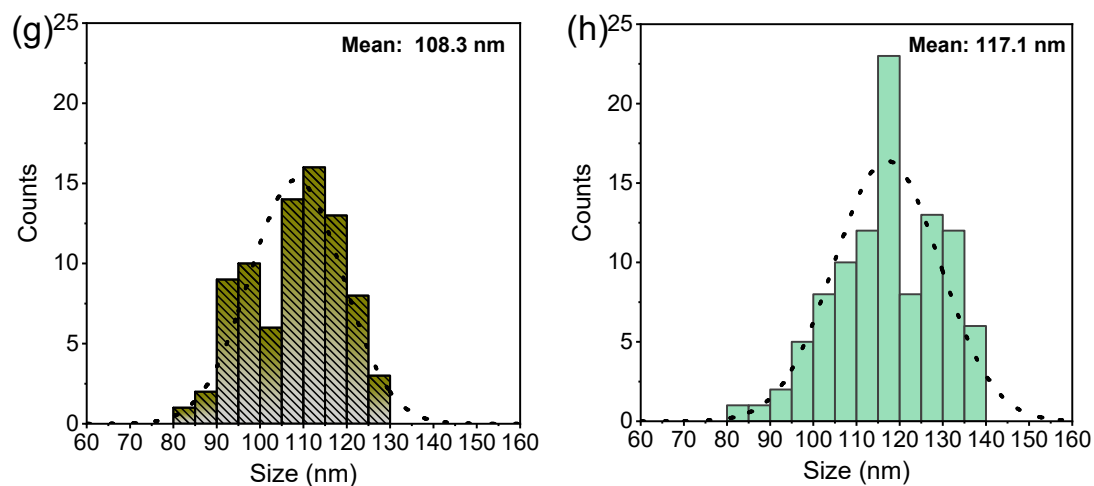

**Fig. S11. TEM and SEM images and size distributions of Au and UiO-66-Zr support nanoparticles for other samples:** (a) and (b) 3Au/UiO-66-NaBH<sub>4</sub>; (c) Corresponding size distributions of Au nanoparticles in 3Au/UiO-66-NaBH<sub>4</sub>; (d) and (e) 3Au/UiO-66-N<sub>2</sub>H<sub>4</sub>; (f) Corresponding size distributions of Au nanoparticles in 3Au/UiO-66-N<sub>2</sub>H<sub>4</sub>; (g) Side length distribution of octahedral UiO-66-Zr support nanoparticles in 3Au/UiO-66-NaBH<sub>4</sub>; (h) Side length distribution of octahedral UiO-66-Zr support nanoparticles in 3Au/UiO-66-N<sub>2</sub>H<sub>4</sub>.

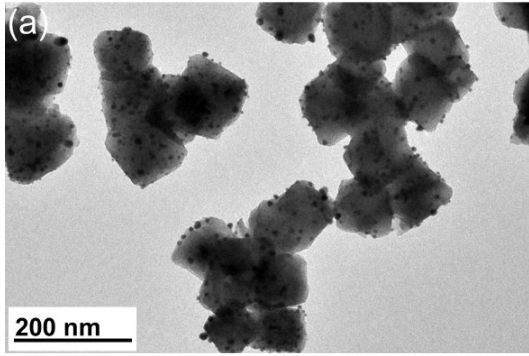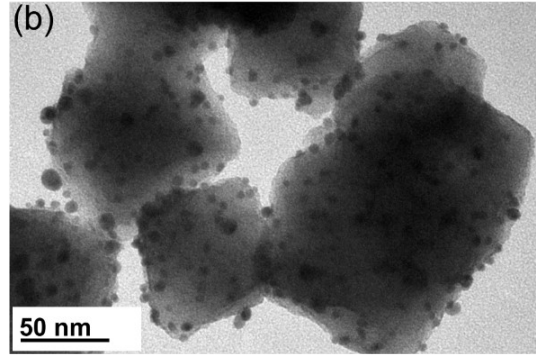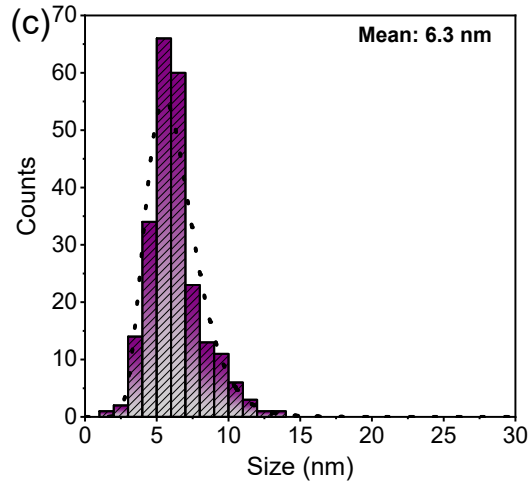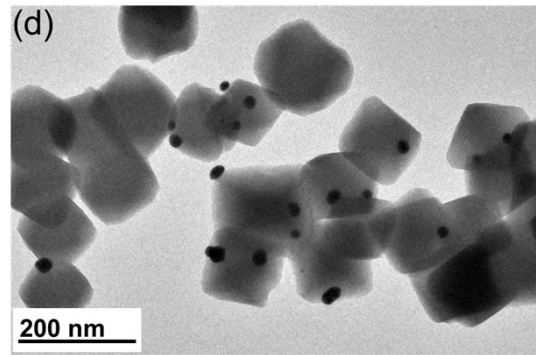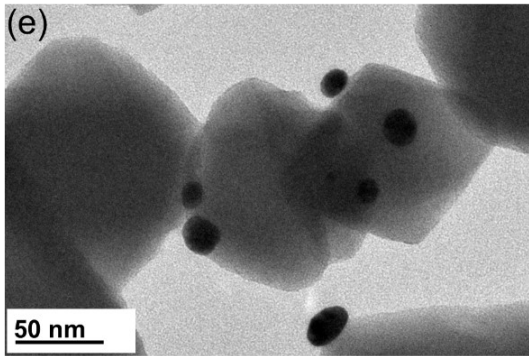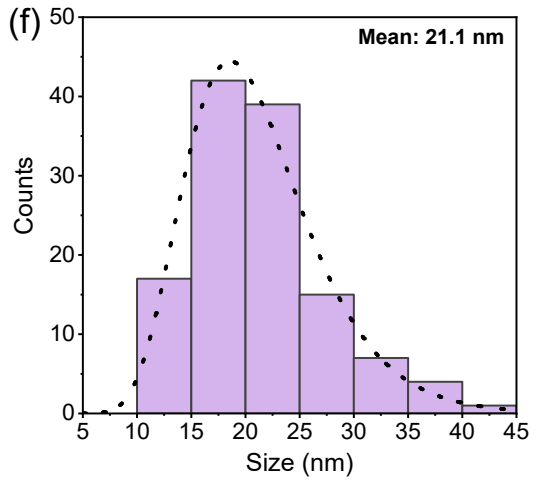

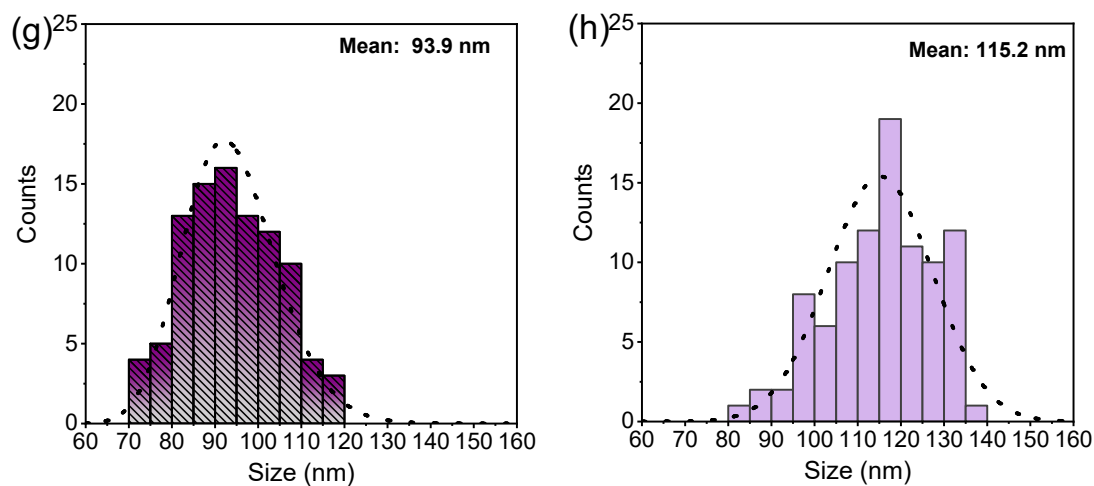

**Fig. S12. TEM and SEM images and size distributions of Au and UiO-66-Zr support nanoparticles for other samples:** (a) and (b) 4Au/UiO-66-NaBH<sub>4</sub>; (c) Corresponding size distributions of Au nanoparticles in 4Au/UiO-66-NaBH<sub>4</sub>; (d) and (e) 4Au/UiO-66-N<sub>2</sub>H<sub>4</sub>; (f) Corresponding size distributions of Au nanoparticles in 4Au/UiO-66-N<sub>2</sub>H<sub>4</sub>; (g) Side length distribution of octahedral UiO-66-Zr support nanoparticles in 4Au/UiO-66-NaBH<sub>4</sub>; (h) Side length distribution of octahedral UiO-66-Zr support nanoparticles in 4Au/UiO-66-N<sub>2</sub>H<sub>4</sub>.

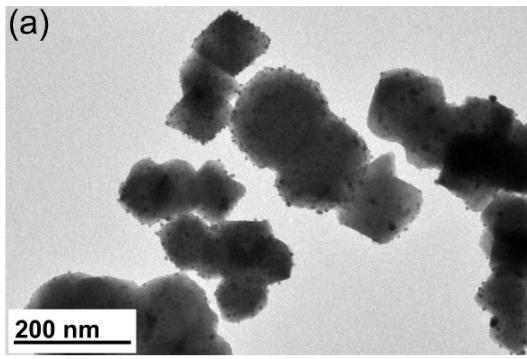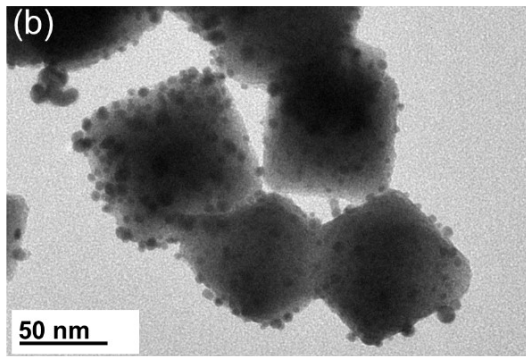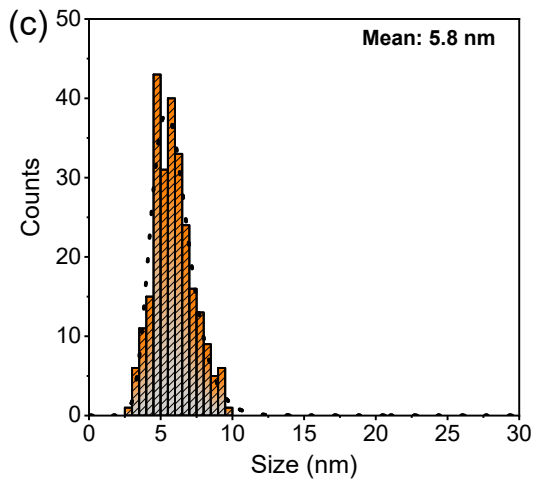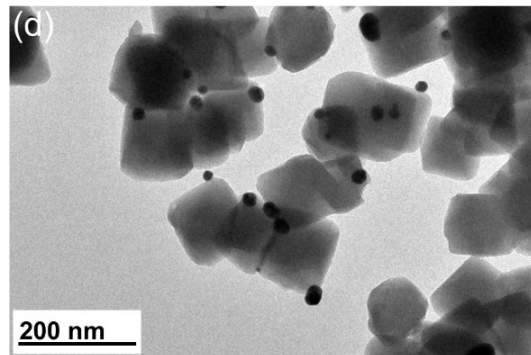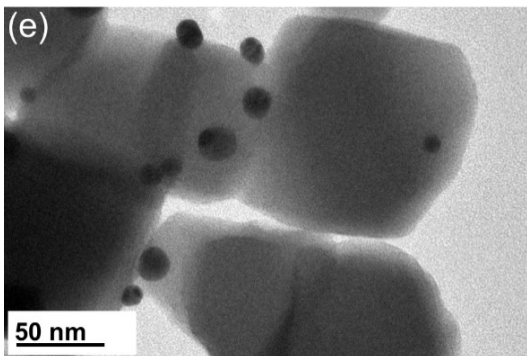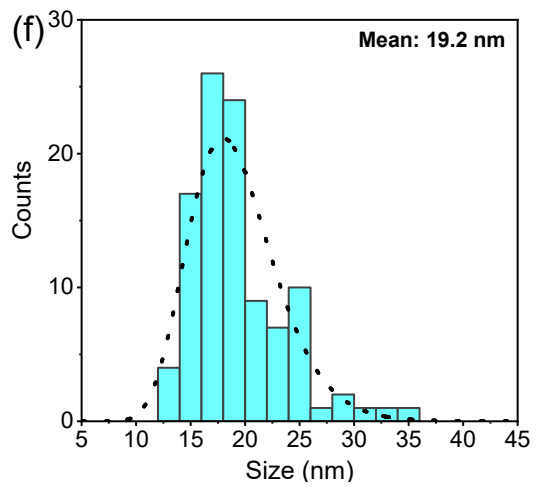

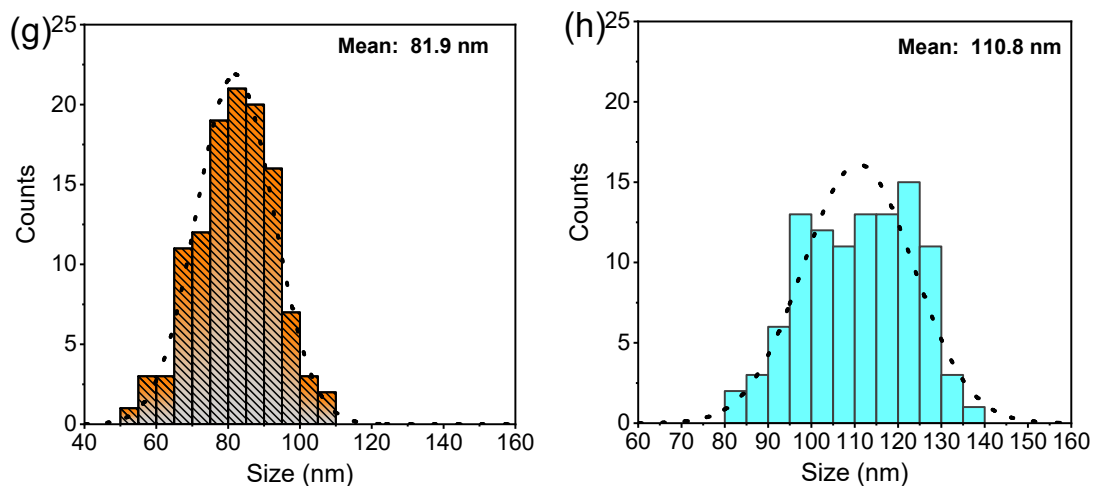

**Fig. S13. TEM and SEM images and size distributions of Au and UiO-66-Zr support nanoparticles for other samples:** (a) and (b) 6Au/UiO-66-NaBH<sub>4</sub>; (c) Corresponding size distributions of Au nanoparticles in 6Au/UiO-66-NaBH<sub>4</sub>; (d) and (e) 6Au/UiO-66-N<sub>2</sub>H<sub>4</sub>; (f) Corresponding size distributions of Au nanoparticles in 6Au/UiO-66-N<sub>2</sub>H<sub>4</sub>; (g) Side length distribution of octahedral UiO-66-Zr support nanoparticles in 6Au/UiO-66-NaBH<sub>4</sub>; (h) Side length distribution of octahedral UiO-66-Zr support nanoparticles in 6Au/UiO-66-N<sub>2</sub>H<sub>4</sub>.

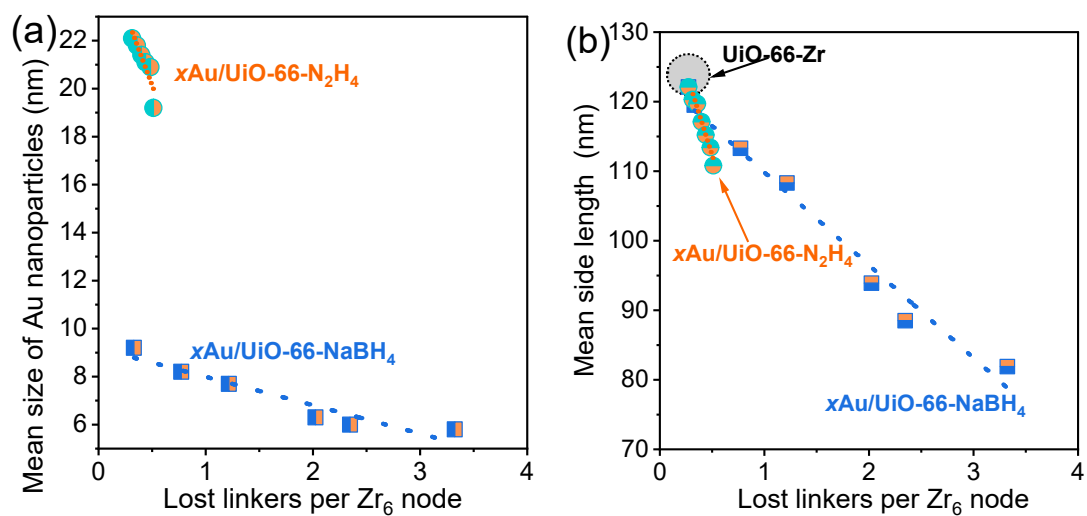

**Fig. S14.** (a) Relationship between lost linkers per  $Zr_6$  node and mean sizes of Au nanoparticles; (b) Relationship between lost linkers per  $Zr_6$  node and mean side lengths of octahedral UiO-66-Zr support nanoparticles.



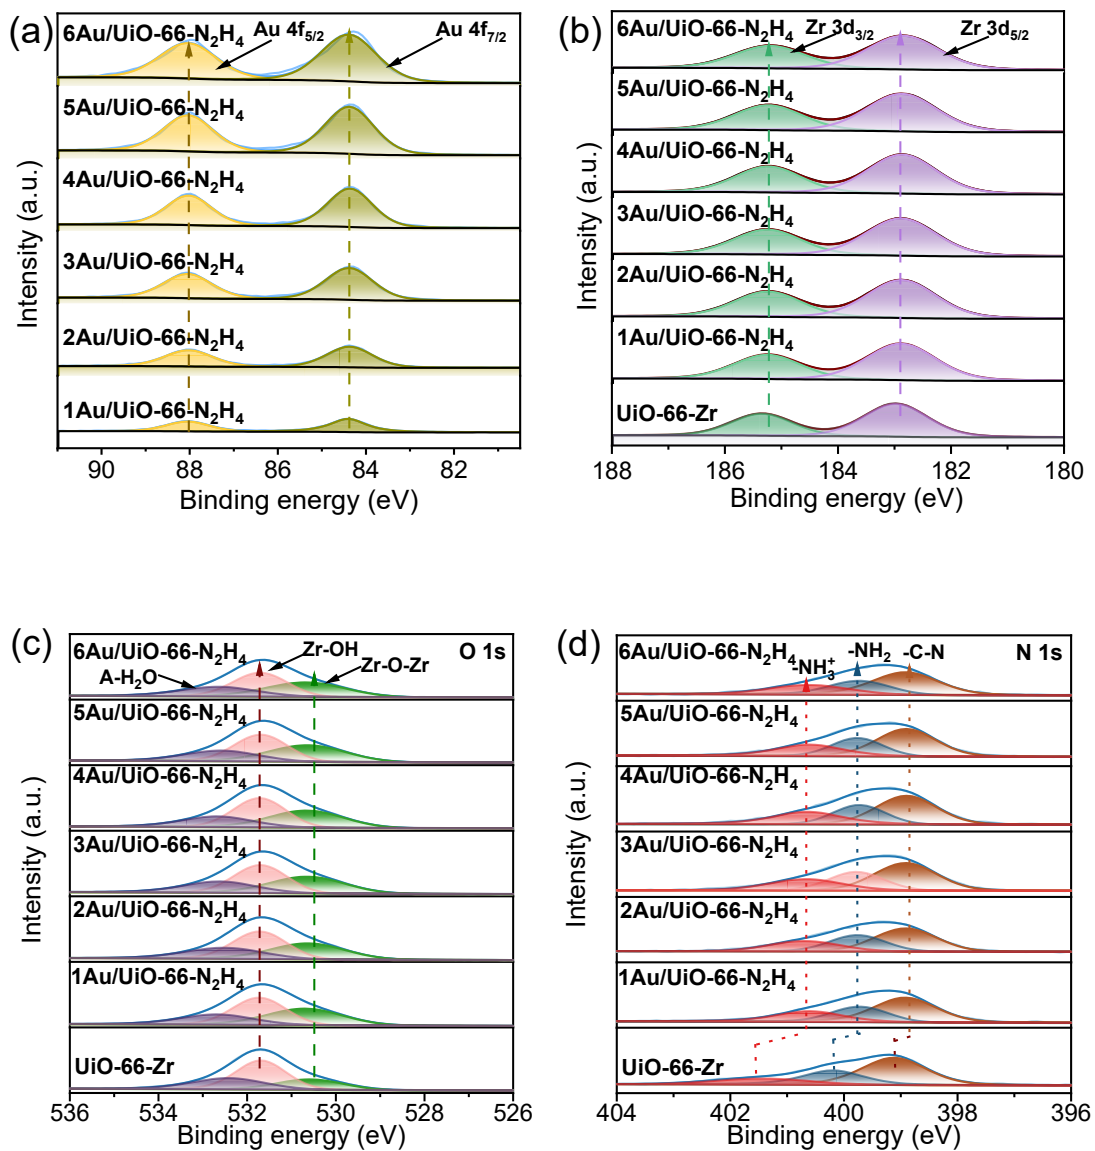

**Fig. S15.** XPS spectra of the pristine UiO-66-Zr and  $x$ Au/UiO-66-N<sub>2</sub>H<sub>4</sub>: (a) Au 4f; (b) Zr 3d; (c) O 1s; (d) N1s.

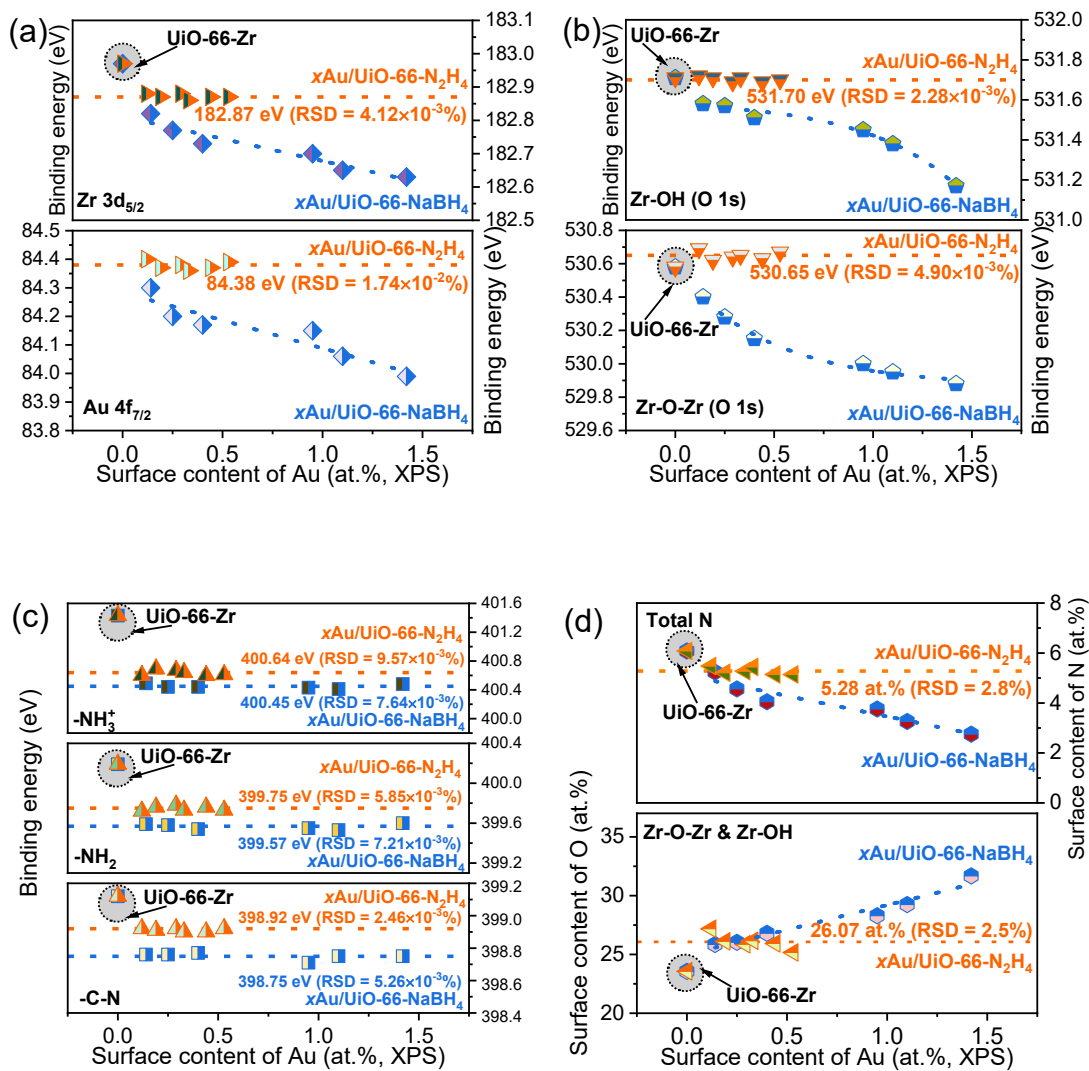

**Fig. S16.** (a) Relationship between surface contents of Au and *BE* values of Au 4f<sub>7/2</sub> and Zr 3d<sub>5/2</sub> (b) Relationship between surface contents of Au and *BE* values of Zr-O-Zr (O 1s) and Zr-OH (O 1s); (c) Relationship between surface contents of Au and *BE* values of -C-N, -NH<sub>2</sub> and -NH<sub>3</sub><sup>+</sup>; (d) Relationship between surface contents of Au and those of Zr-O-Zr & Zr-OH and total N.

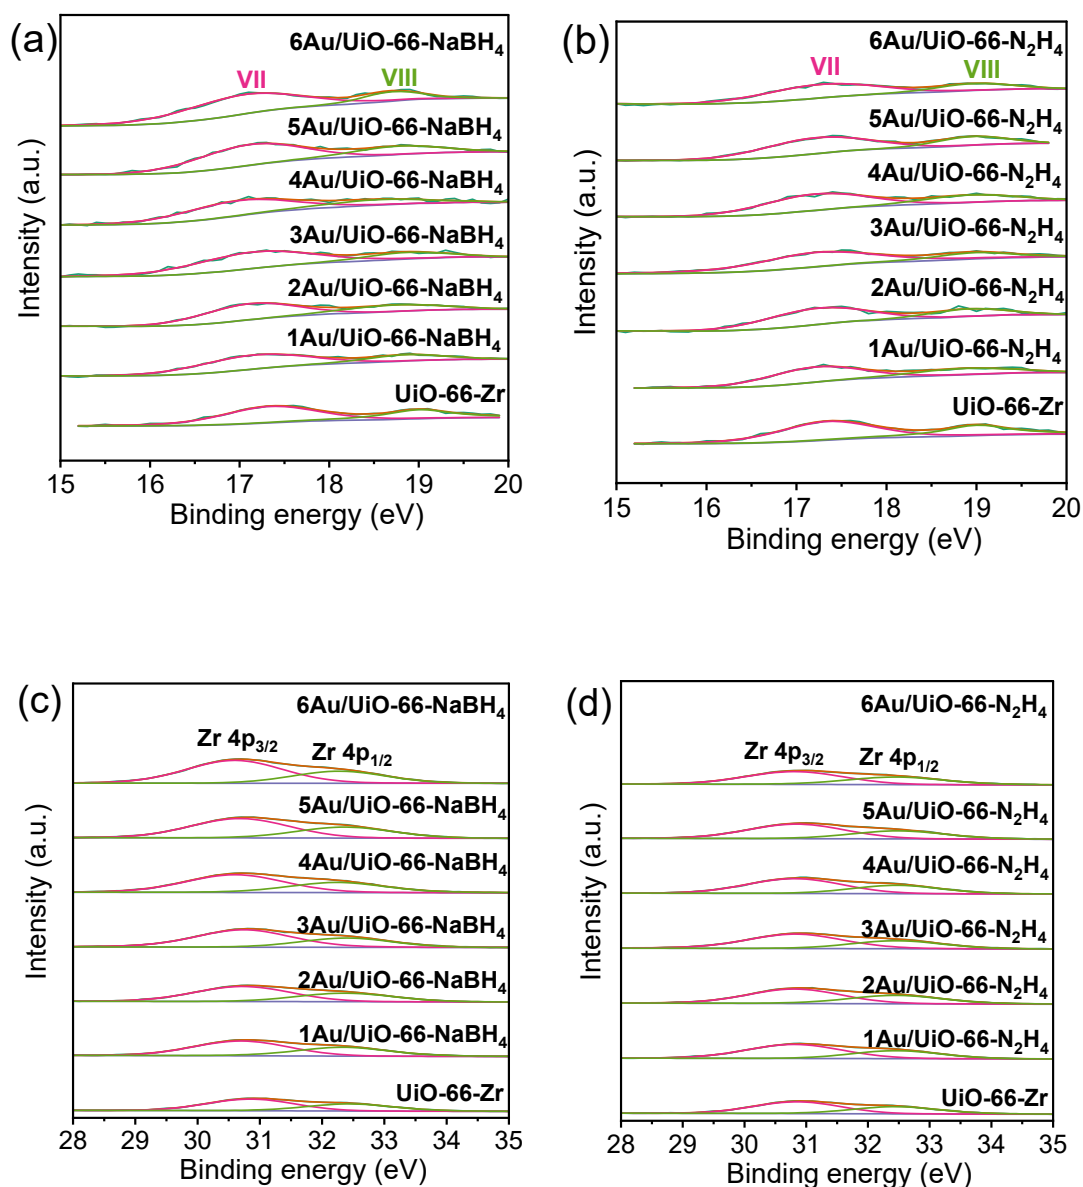

**Fig. S17.** Additional XPS VB spectra (15~20 eV and 28~35 eV) for the pristine UiO-66-Zr,  $x$ Au/UiO-66-NaBH<sub>4</sub> and  $x$ Au/UiO-66-N<sub>2</sub>H<sub>4</sub>.

**Note S1:** Bands VII and VIII within the range from 15 to 20 eV are attributed to C 2s and N 2s, respectively. The bands within the range from 28 to 35 eV correspond to Zr 4p, which also have spin-orbit doublets, i.e., Zr 4p<sub>3/2</sub> and Zr 4p<sub>1/2</sub>. The *BE* values for C 2s for various samples of  $x$ Au/UiO-66-NaBH<sub>4</sub> are close, which have the mean value of

~17.12 eV with a low RSD of ~0.68%. Similar thing also happens to N 2s (mean value of ~18.78 eV with a low RSD of ~0.80%), Zr 4p<sub>3/2</sub> (mean value of ~30.70 eV with a low RSD of ~0.28%), and Zr 4p<sub>1/2</sub> (mean value of ~32.34 eV with a low RSD of ~0.21%). In addition, similar thing also happens to C 2s (mean value of ~17.24 eV with a low RSD of ~0.29%), N 2s (mean value of ~18.94 eV with a low RSD of ~0.23%), Zr 4p<sub>3/2</sub> (mean value of ~30.82 eV with a low RSD of ~0.05%), and Zr 4p<sub>1/2</sub> (mean value of ~32.46 eV with a low RSD of ~0.05%) for the samples of *x*Au/UiO-66-N<sub>2</sub>H<sub>4</sub>. The results suggest that the *BE* of C 2s, N 2s, and Zr 4p is hardly affected by the loaded Au or the lost-linker defects for both *x*Au/UiO-66-NaBH<sub>4</sub> and *x*Au/UiO-66-N<sub>2</sub>H<sub>4</sub>.

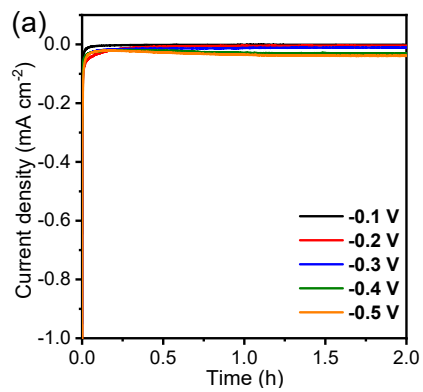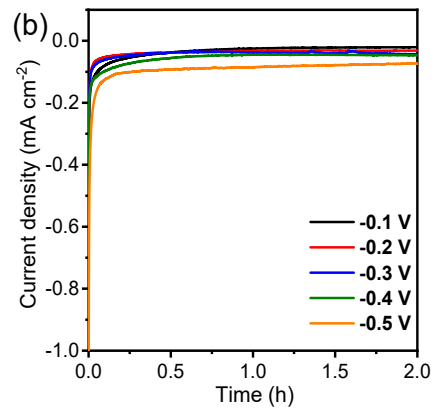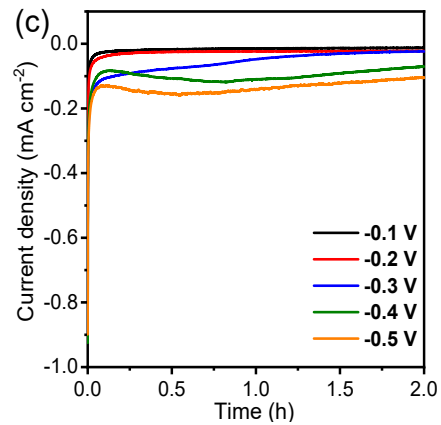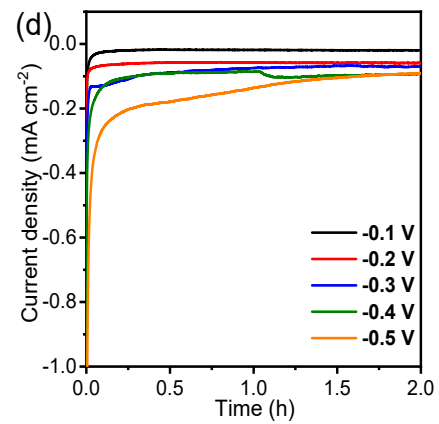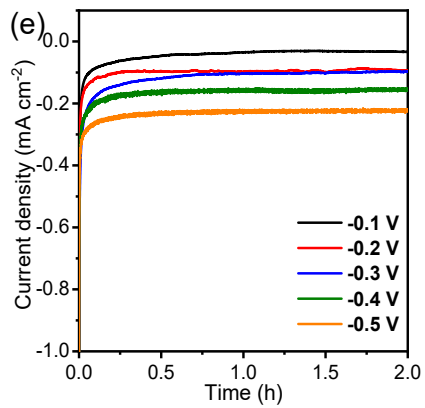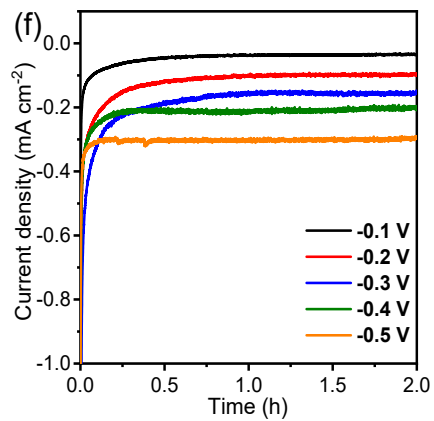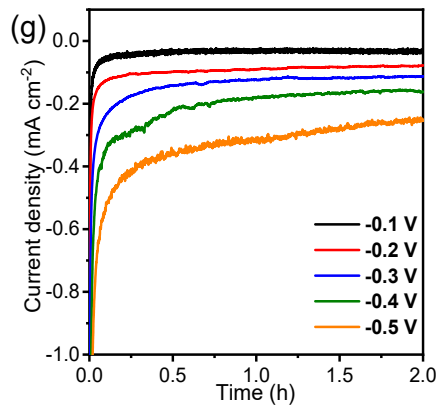

**Fig. S18. *I-t* curves at different potentials:** (a) The pristine UiO-66-Zr; (b) 1Au/UiO-66-NaBH<sub>4</sub>; (c) 2Au/UiO-66-NaBH<sub>4</sub>, (d) 3Au/UiO-66-NaBH<sub>4</sub>; (e) 4Au/UiO-66-NaBH<sub>4</sub>; (f) 5Au/UiO-66-NaBH<sub>4</sub>; (g) 6Au/UiO-66-NaBH<sub>4</sub>.

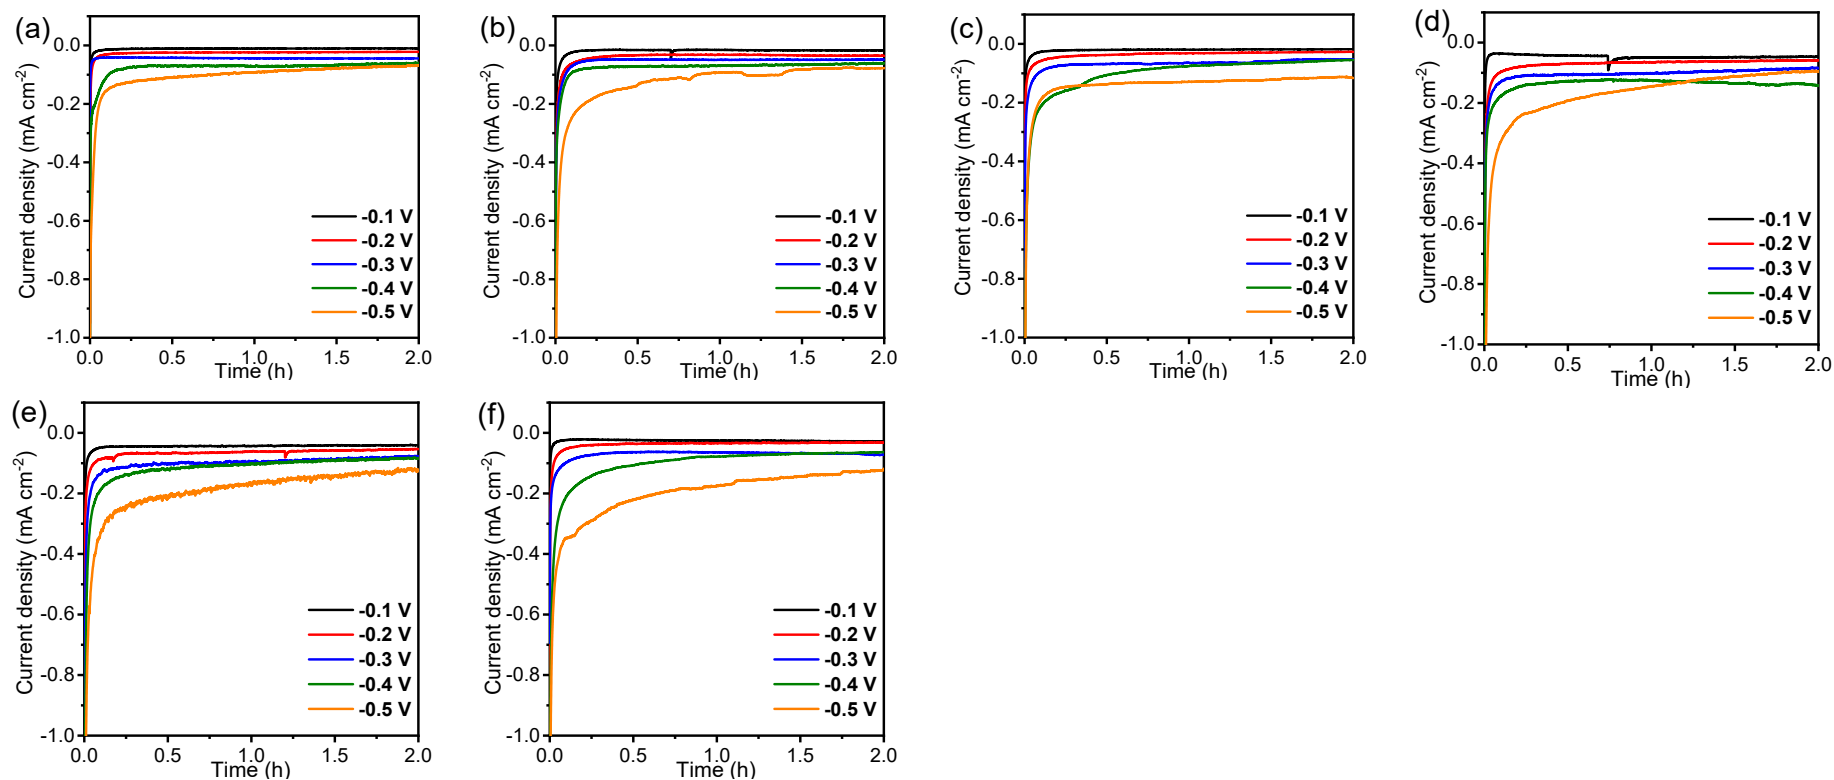

**Fig. S19. *I-t* curves at different potentials:** (a) 1Au/UiO-66-N<sub>2</sub>H<sub>4</sub>; (b) 2Au/UiO-66-N<sub>2</sub>H<sub>4</sub>; (c) 3Au/UiO-66-N<sub>2</sub>H<sub>4</sub>; (d) 4Au/UiO-66-N<sub>2</sub>H<sub>4</sub>; (e) 5Au/UiO-66-N<sub>2</sub>H<sub>4</sub>; (f) 6Au/UiO-66-N<sub>2</sub>H<sub>4</sub>.

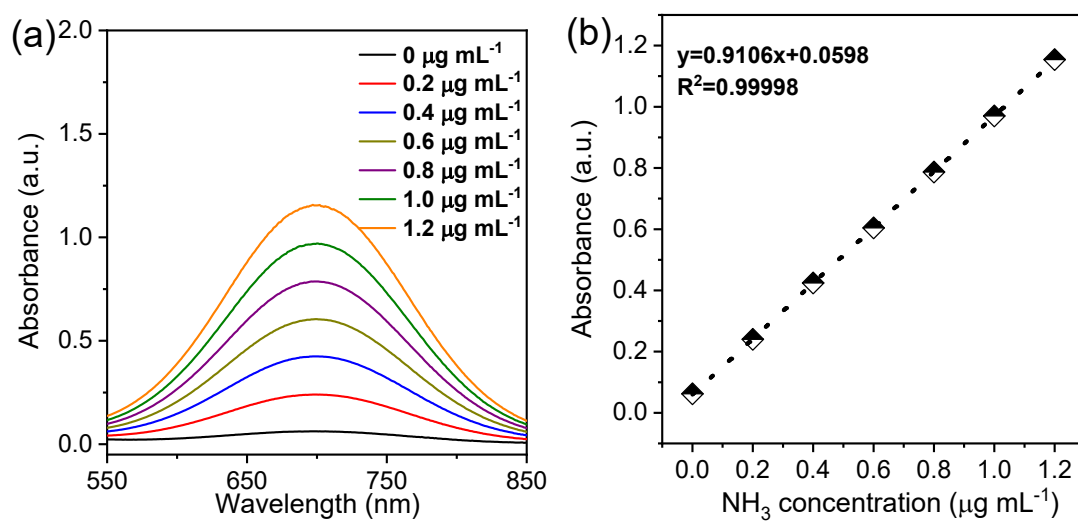

**Fig. S20.** (a) UV-vis spectra for ammonium chloride (NH<sub>4</sub>Cl) solutions via indophenol method; (b) Standard absorbance-NH<sub>3</sub> concentration calibration curve.



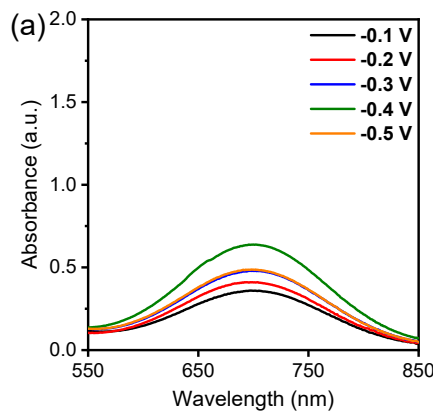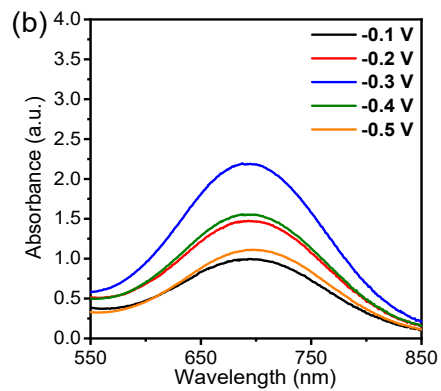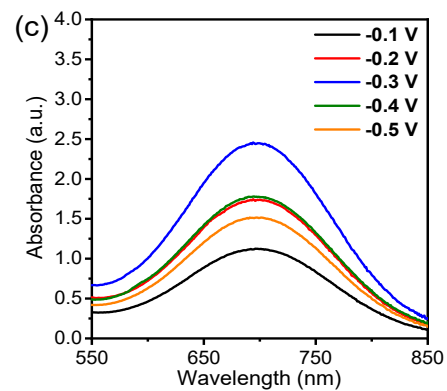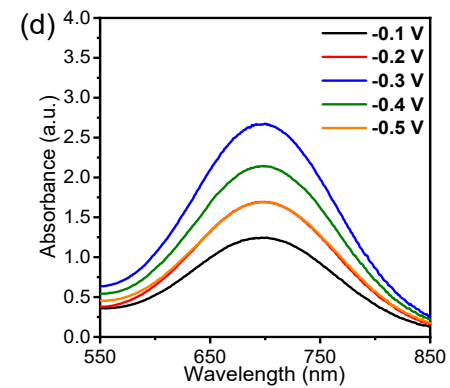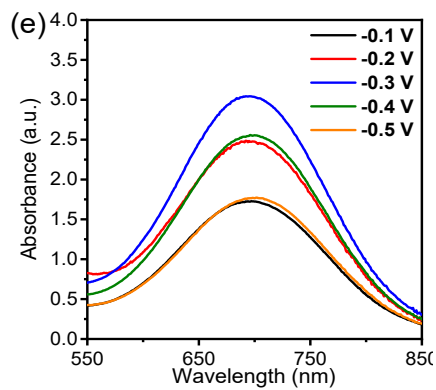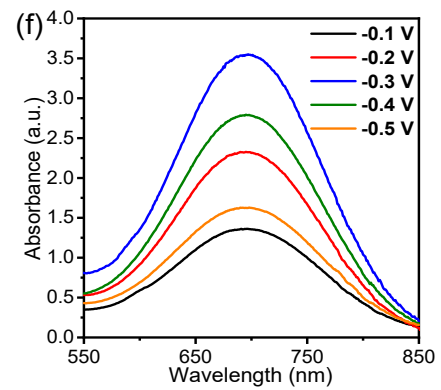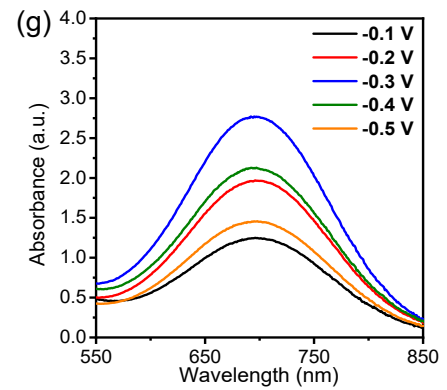

**Fig. S21. UV-vis absorption spectra using indophenol method under different potentials:** (a) The pristine UiO-66-Zr; (b) 1Au/UiO-66-NaBH<sub>4</sub>; (c) 2Au/UiO-66-NaBH<sub>4</sub>, (d) 3Au/UiO-66-NaBH<sub>4</sub>; (e) 4Au/UiO-66-NaBH<sub>4</sub>; (f) 5Au/UiO-66-NaBH<sub>4</sub>; (g) 6Au/UiO-66-NaBH<sub>4</sub>.

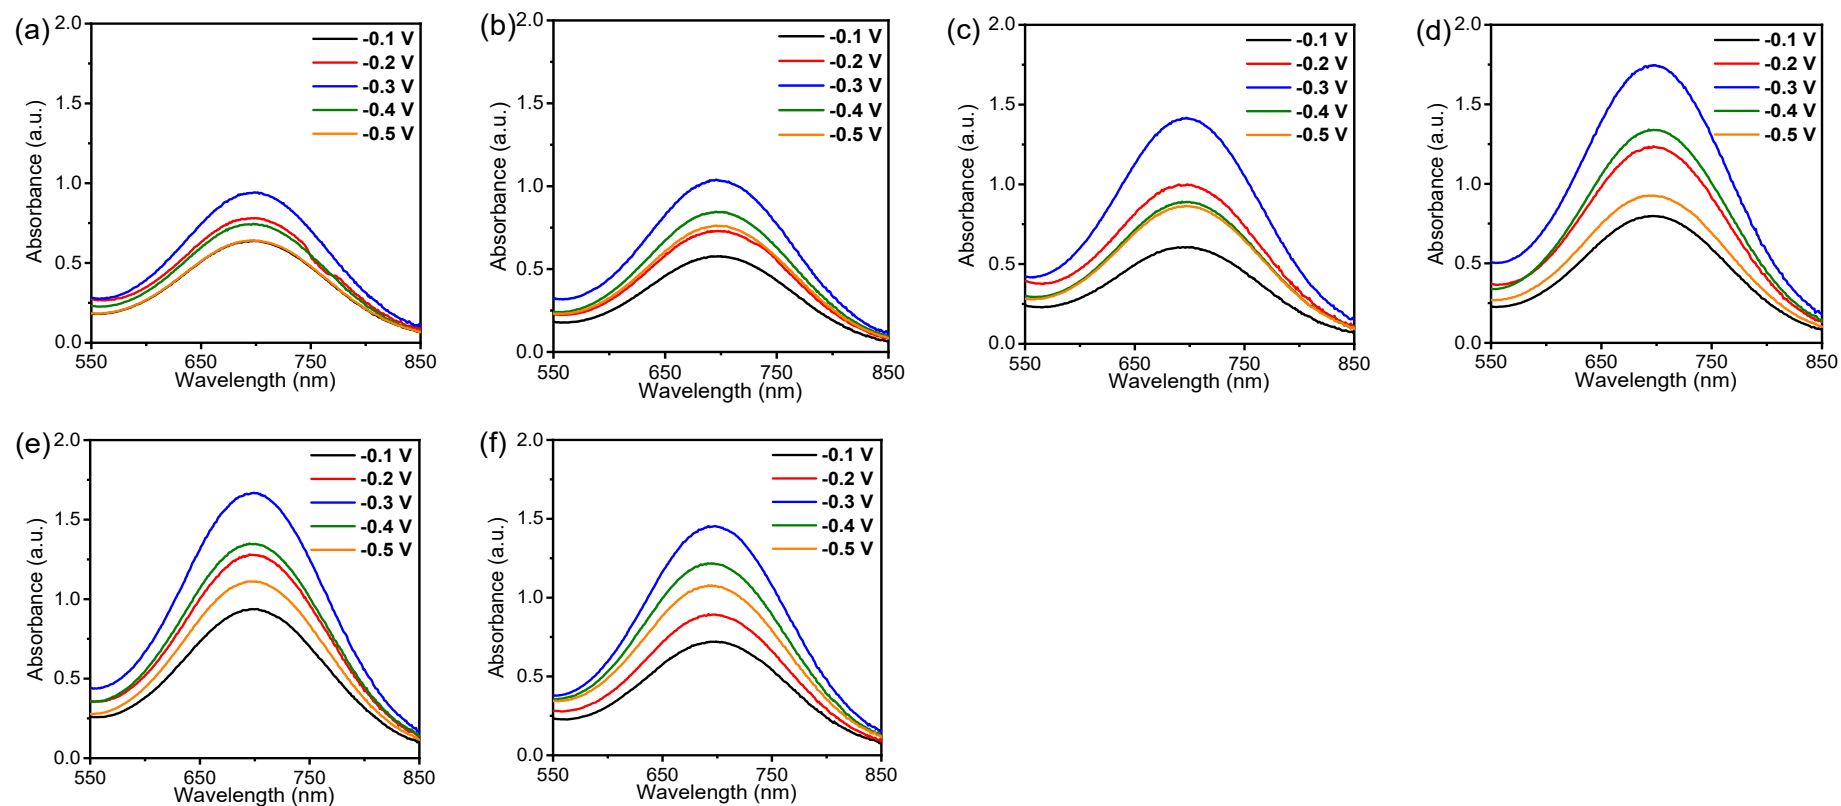

**Fig. S22. UV-vis absorption spectra using indophenol method under different potentials:** (a) 1Au/Uio-66-N<sub>2</sub>H<sub>4</sub>; (b) 2Au/Uio-66-N<sub>2</sub>H<sub>4</sub>; (c) 3Au/Uio-66-N<sub>2</sub>H<sub>4</sub>; (d) 4Au/Uio-66-N<sub>2</sub>H<sub>4</sub>; (e) 5Au/Uio-66-N<sub>2</sub>H<sub>4</sub>; (f) 6Au/Uio-66-N<sub>2</sub>H<sub>4</sub>.

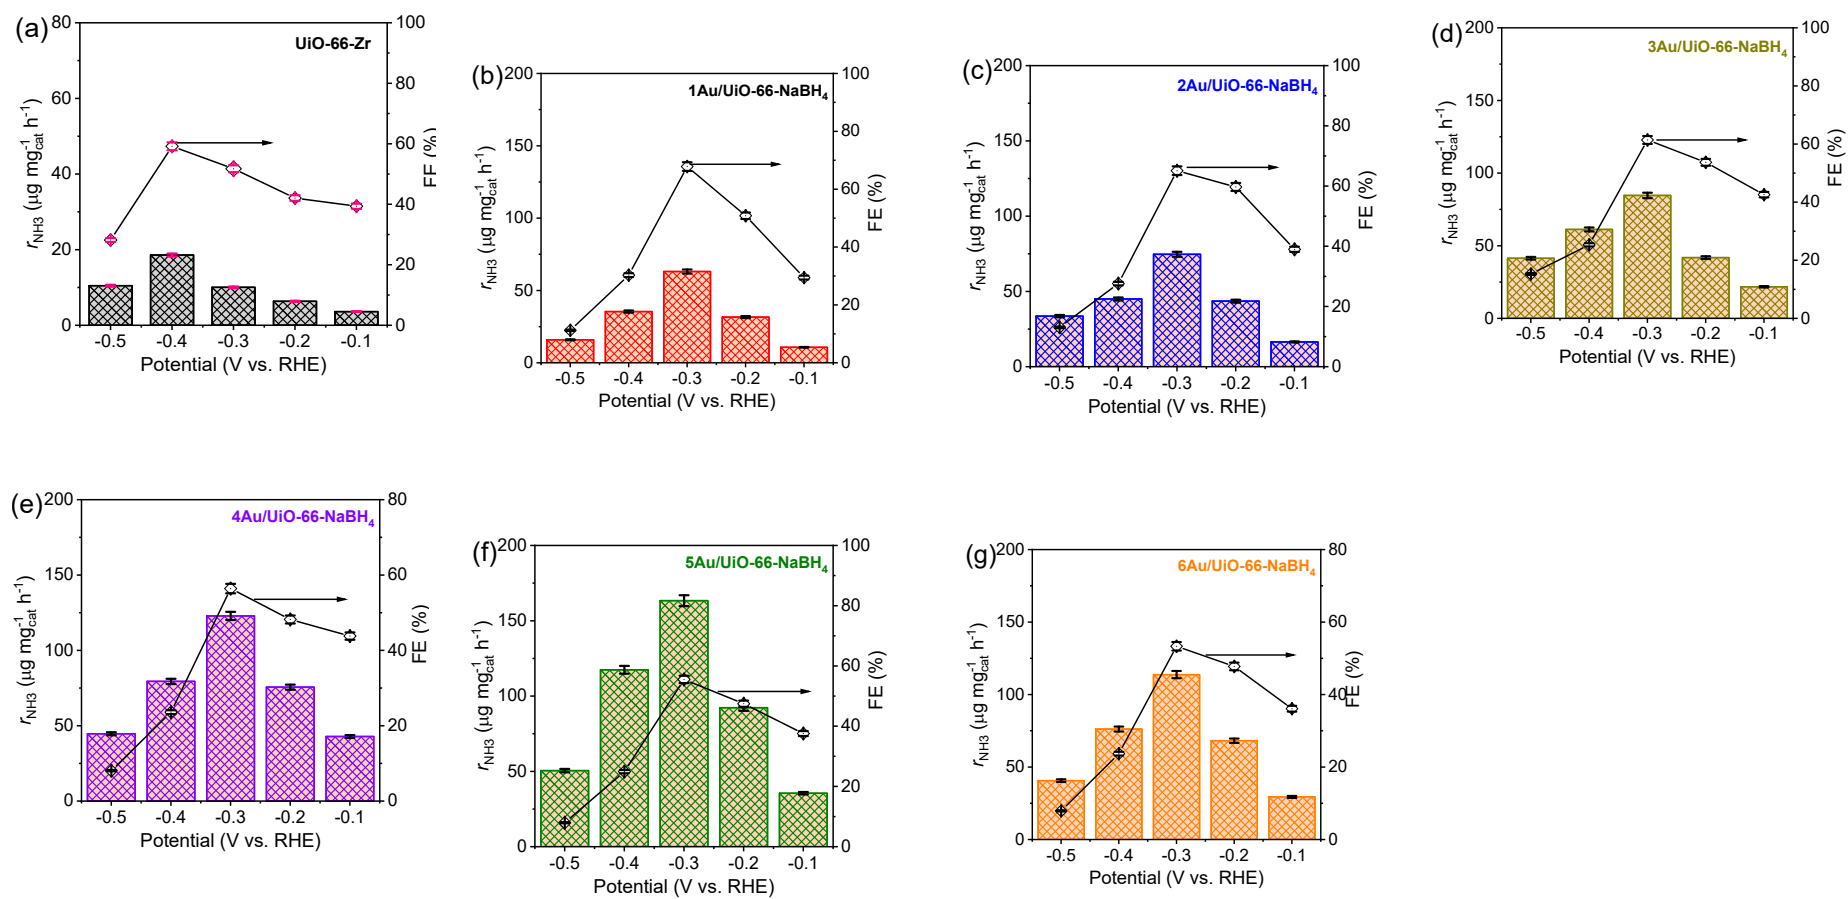

**Fig. S23.**  $R_{\text{NH}_3}$  and FE at different potentials: (a) The pristine UiO-66-Zr; (b) 1Au/UiO-66-NaBH<sub>4</sub>; (c) 2Au/UiO-66-NaBH<sub>4</sub>, (d) 3Au/UiO-66-

NaBH<sub>4</sub>; (e) 4Au/UiO-66-NaBH<sub>4</sub>; (f) 5Au/UiO-66-NaBH<sub>4</sub>; (g) 6Au/UiO-66-NaBH<sub>4</sub>.



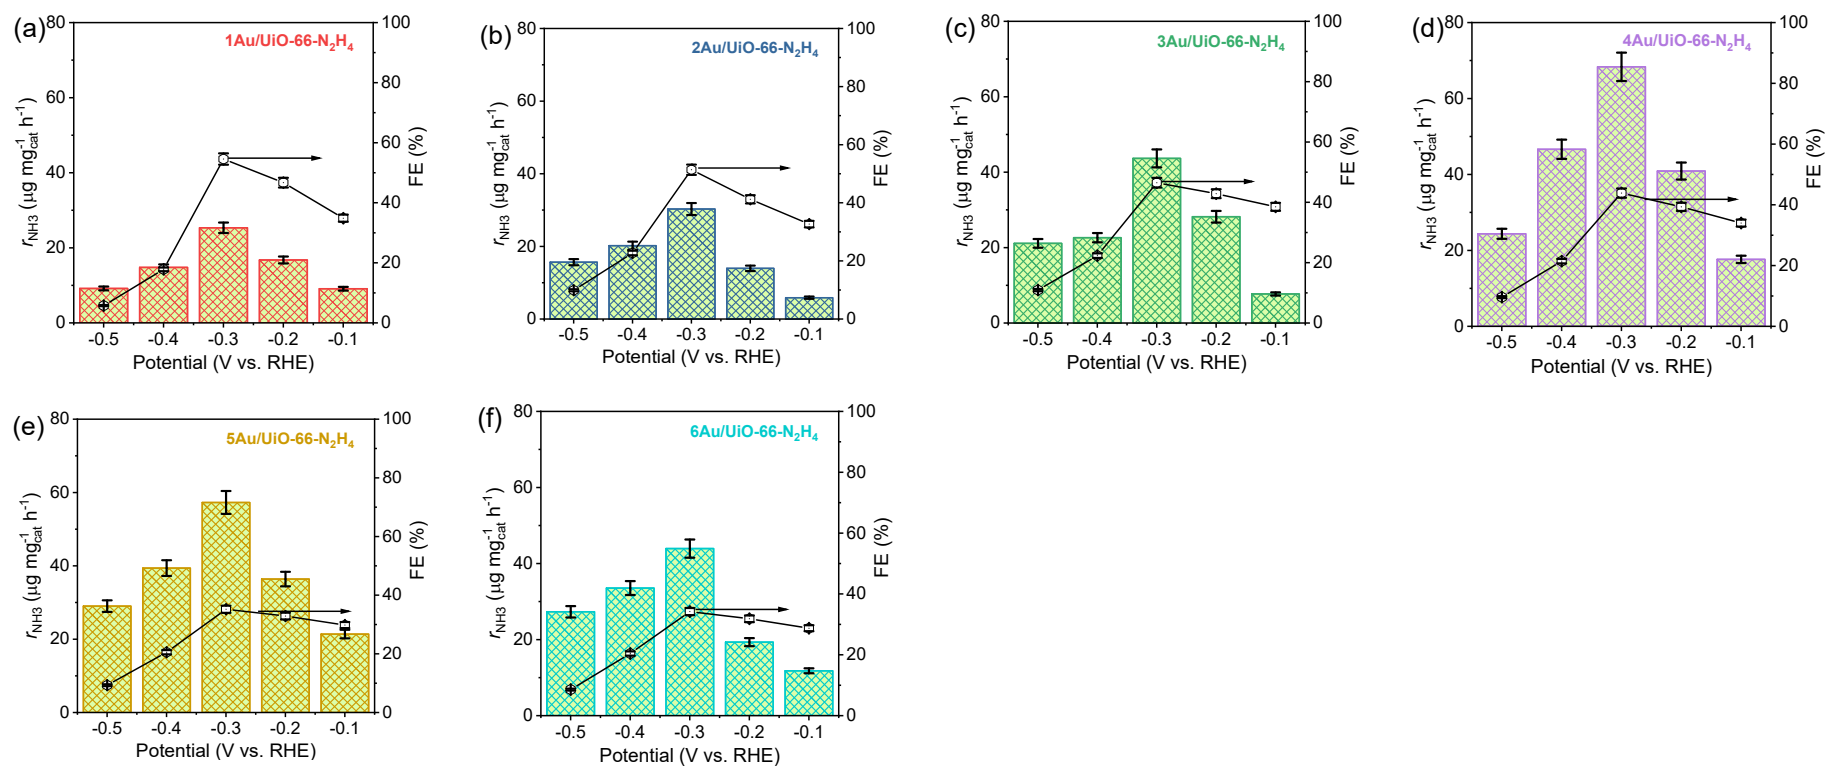

**Fig. S24.**  $R_{\text{NH}_3}$  and FE at different potentials: (a) 1Au/UiO-66-N<sub>2</sub>H<sub>4</sub>; (b) 2Au/UiO-66-N<sub>2</sub>H<sub>4</sub>; (c) 3Au/UiO-66-N<sub>2</sub>H<sub>4</sub>; (d) 4Au/UiO-66-N<sub>2</sub>H<sub>4</sub>; (e) 5Au/UiO-66-N<sub>2</sub>H<sub>4</sub>; (f) 6Au/UiO-66-N<sub>2</sub>H<sub>4</sub>.

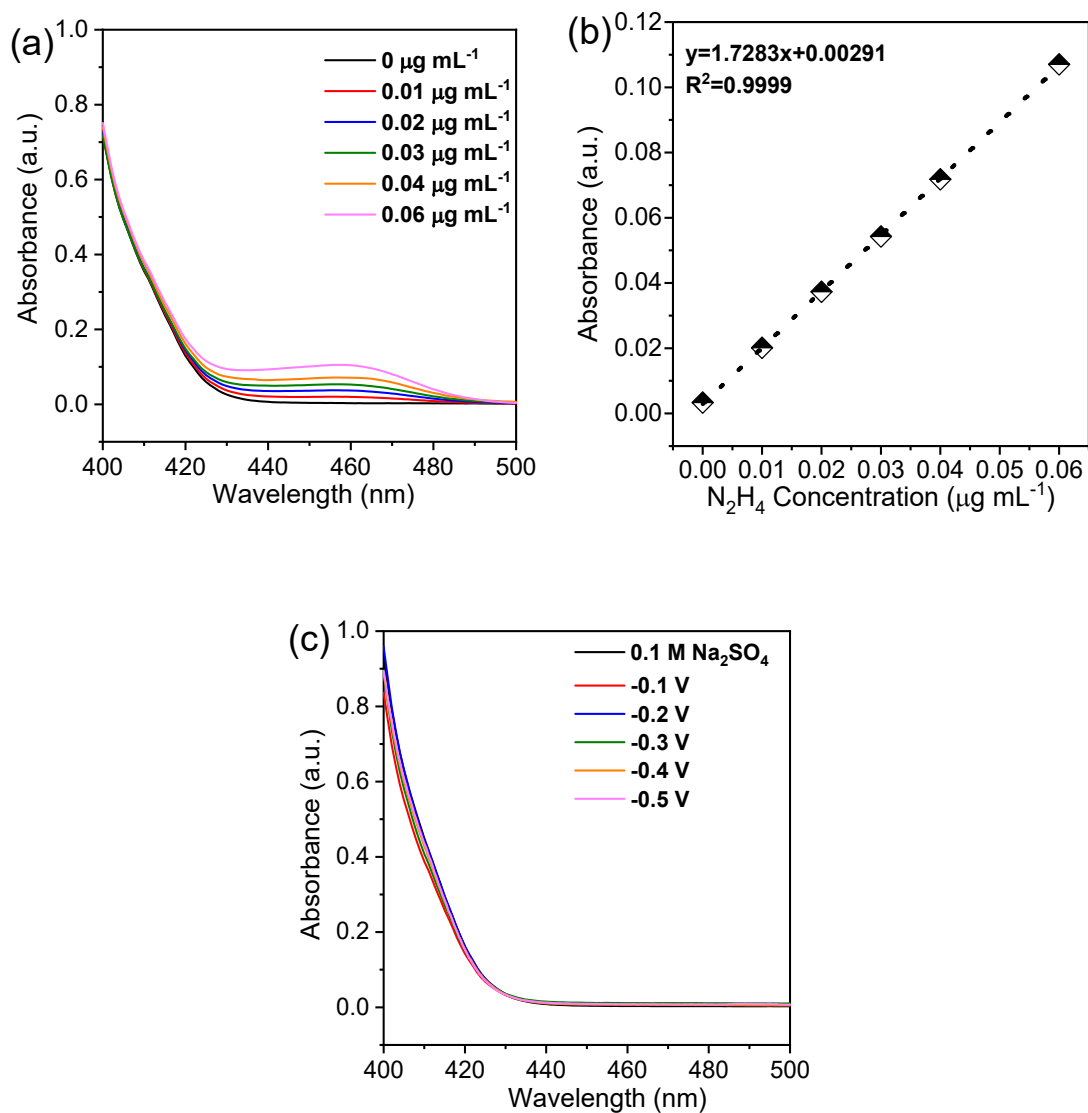

**Fig. S25.** (a) UV-vis spectra for standard  $\text{N}_2\text{H}_4$  solutions via Watt-Chrisp method; (b) Absorbance- $\text{N}_2\text{H}_4$  concentration calibration curve; (c) UV-vis spectra of the electrolytes after NRR over  $5\text{Au}/\text{UiO}-66-\text{NaBH}_4$  via the Watt-Chrisp method.



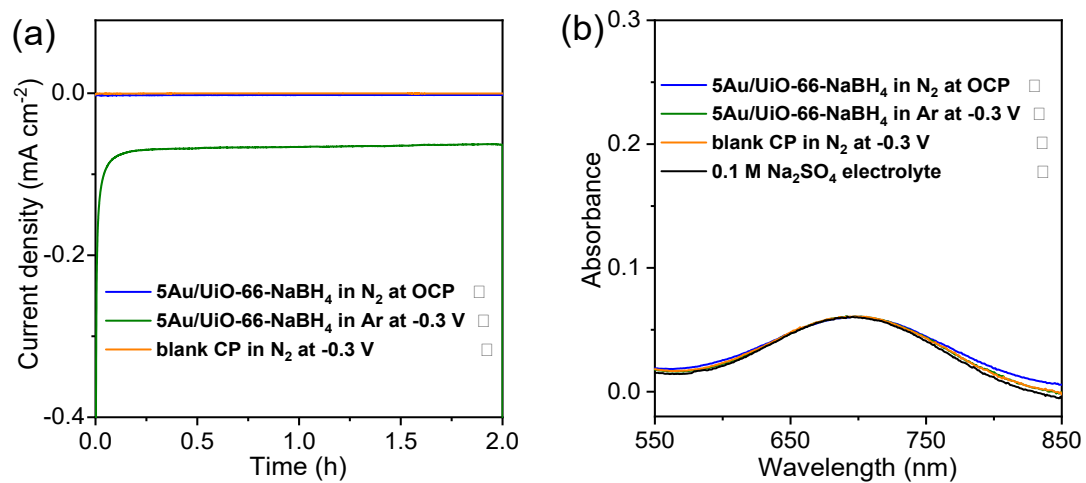

**Fig. S26.** (a) *I-t* curves of different control experiments; (b) UV-vis absorption spectra of the corresponding electrolytes.

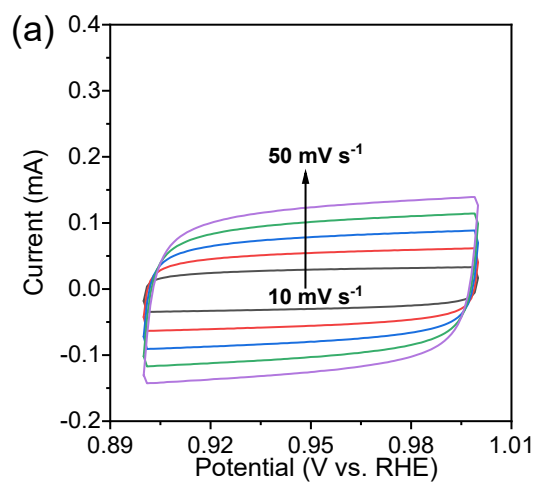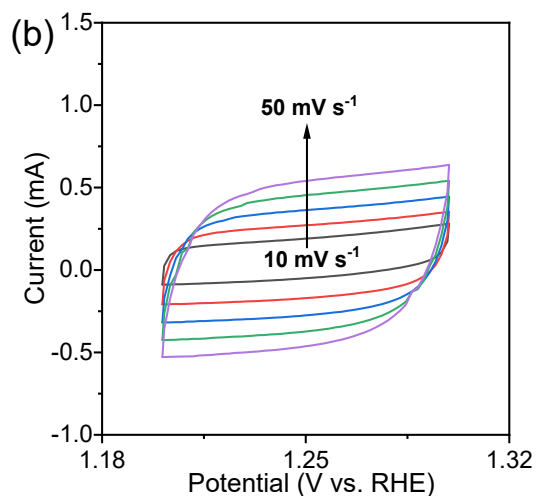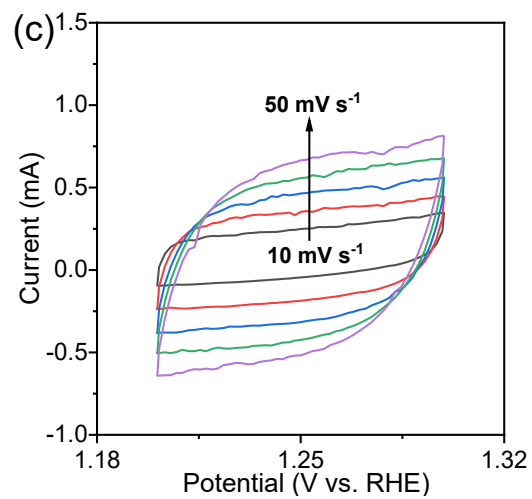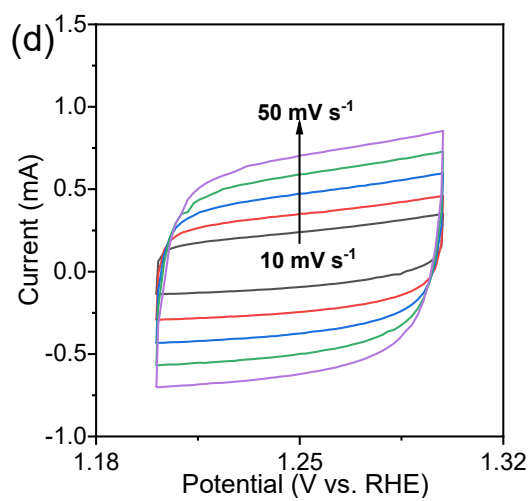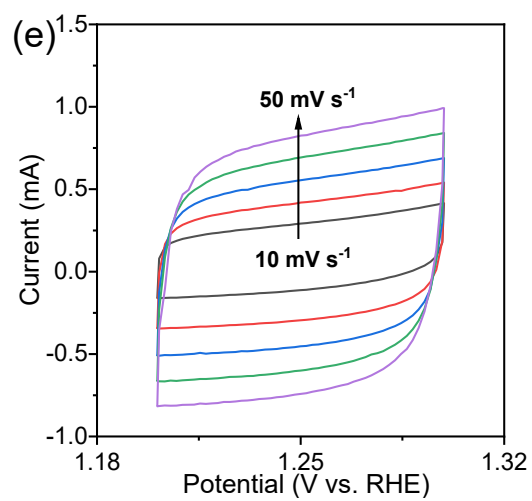

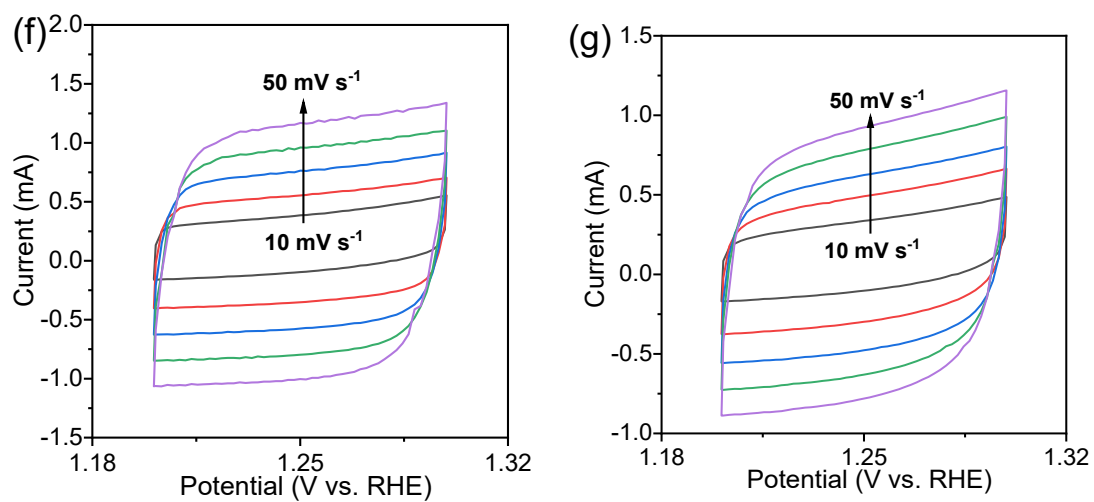

**Fig. S27. CV curves at different scan rates within the potential ranges without Faradic currents:** (a) The pristine UiO-66-Zr; (b) 1Au/UiO-66-NaBH<sub>4</sub>; (c) 2Au/UiO-66-NaBH<sub>4</sub>; (d) 3Au/UiO-66-NaBH<sub>4</sub>; (e) 4Au/UiO-66-NaBH<sub>4</sub>; (f) 5Au/UiO-66-NaBH<sub>4</sub>; (g) 6Au/UiO-66-NaBH<sub>4</sub>.

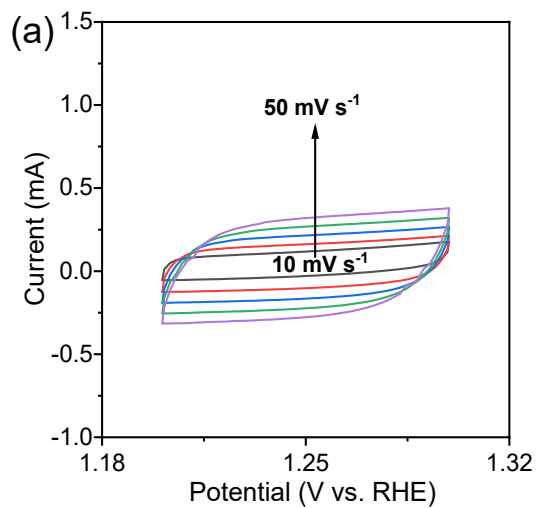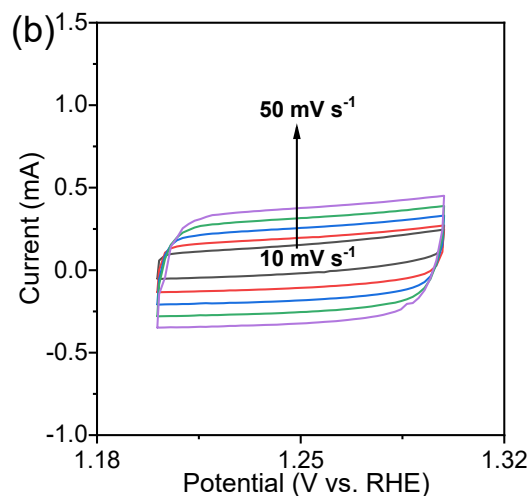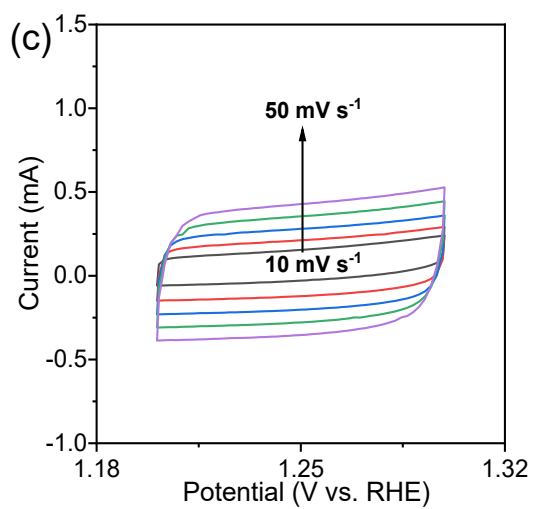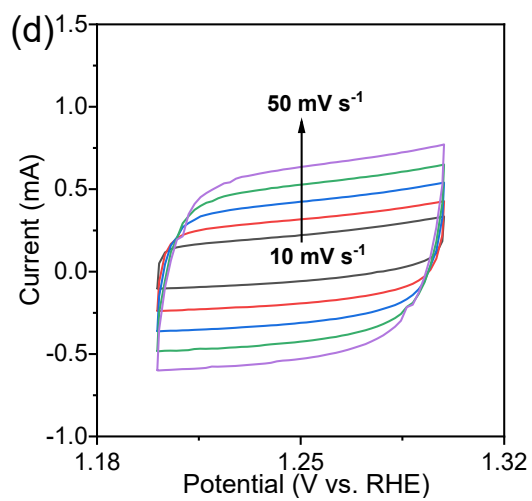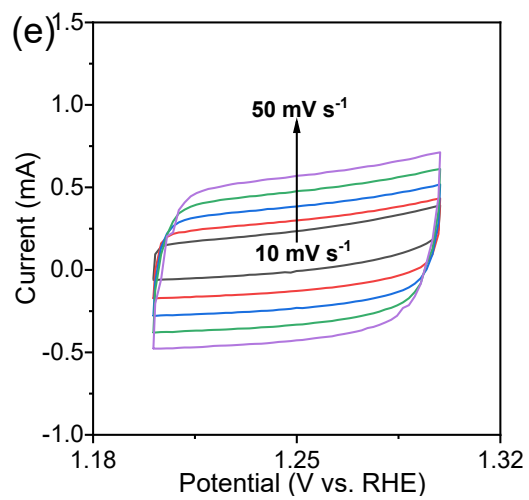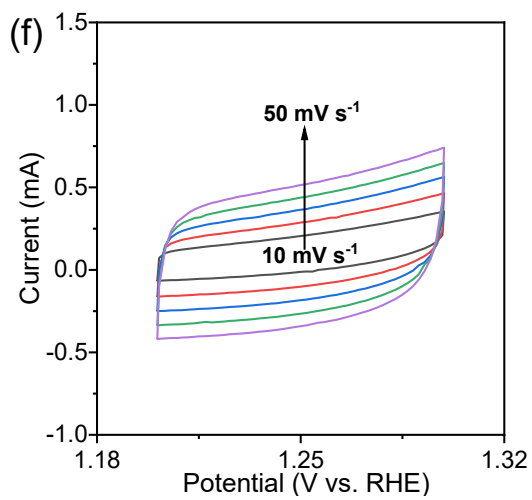

**Fig. S28. CV curves at different scan rates within the potential ranges without Faradic currents:** (a) 1Au/UiO-66-N<sub>2</sub>H<sub>4</sub>; (b) 2Au/UiO-66-N<sub>2</sub>H<sub>4</sub>; (c) 3Au/UiO-66-N<sub>2</sub>H<sub>4</sub>; (d) 4Au/UiO-66-N<sub>2</sub>H<sub>4</sub>; (e) 5Au/UiO-66-N<sub>2</sub>H<sub>4</sub>; (f) 6Au/UiO-66-N<sub>2</sub>H<sub>4</sub>.

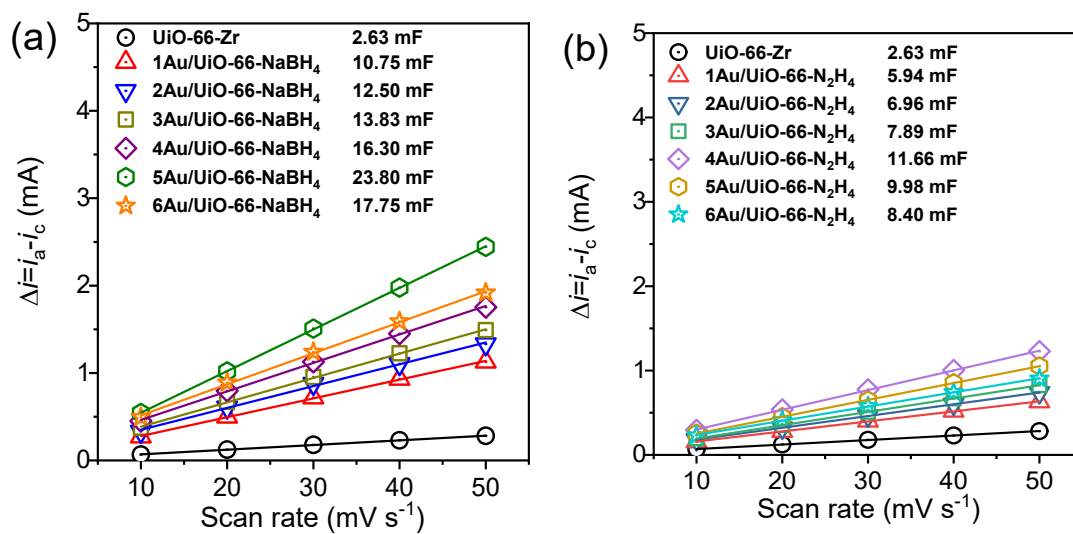

**Fig. S29.** (a) and (b) The plots of the relationship between scan rates and differences of anode and cathode currents for  $x\text{Au}/\text{UiO-66-NaBH}_4$  and  $x\text{Au}/\text{UiO-66-N}_2\text{H}_4$ , respectively, also including that for the pristine UiO-66-Zr.

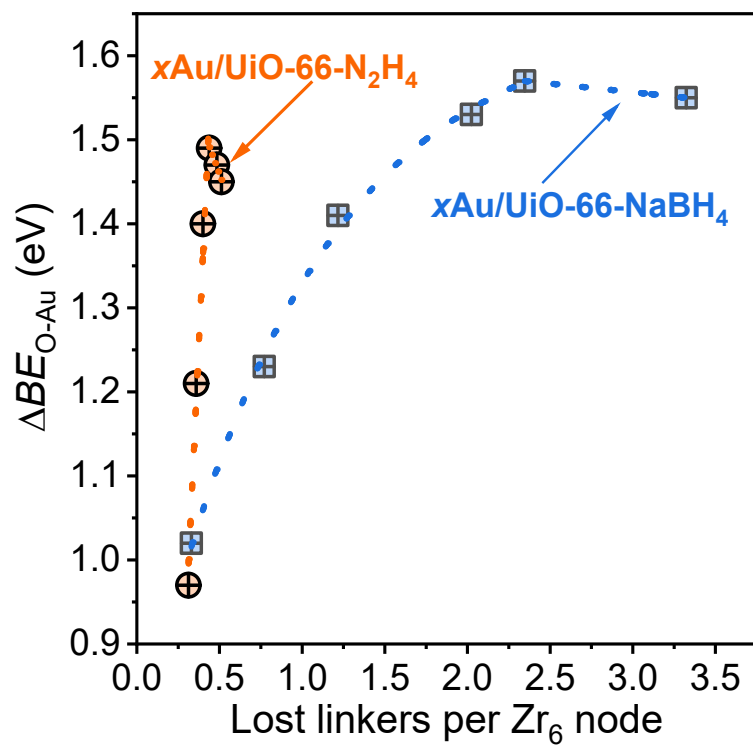

**Fig. S30.** Relations between  $\Delta BE_{O-Au}$  and lost linkers per  $Zr_6$  node.

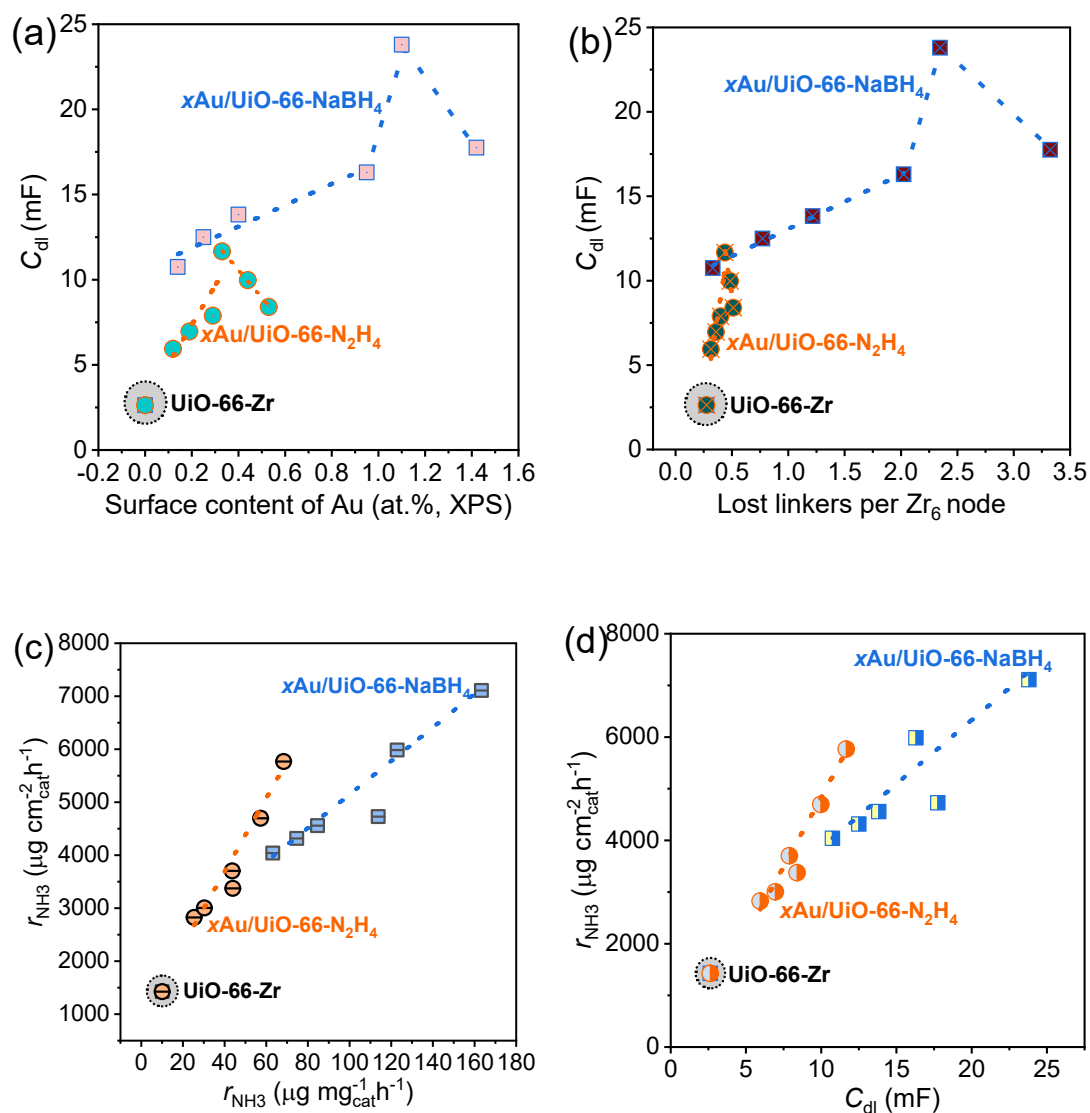

**Fig. S31.** (a) Relationships between surface contents of Au and  $C_{dl}$ ; (b) Relationships between lost linkers per  $\text{Zr}_6$  node and  $C_{dl}$ ; (c) Relationships between  $r_{\text{NH}_3}$  and BET SSAs-normalized  $r_{\text{NH}_3}$ ; (d) Relationships between  $C_{dl}$  and BET SSAs-normalized  $r_{\text{NH}_3}$ .



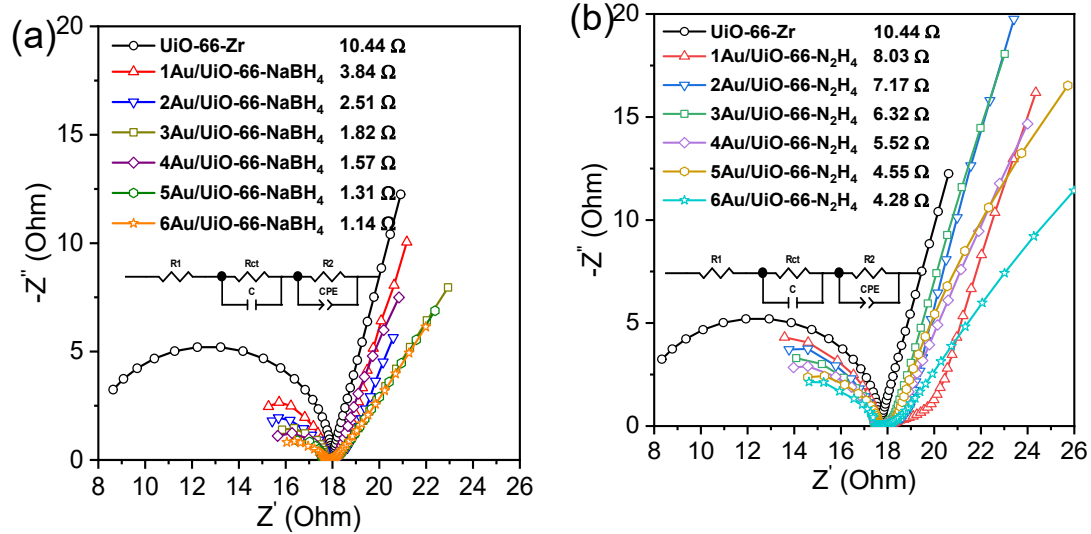

**Fig. S32.** (a) and (b) EIS plots at OCP for  $x\text{Au}/\text{UiO-66-NaBH}_4$  and  $x\text{Au}/\text{UiO-66-N}_2\text{H}_4$ , respectively.

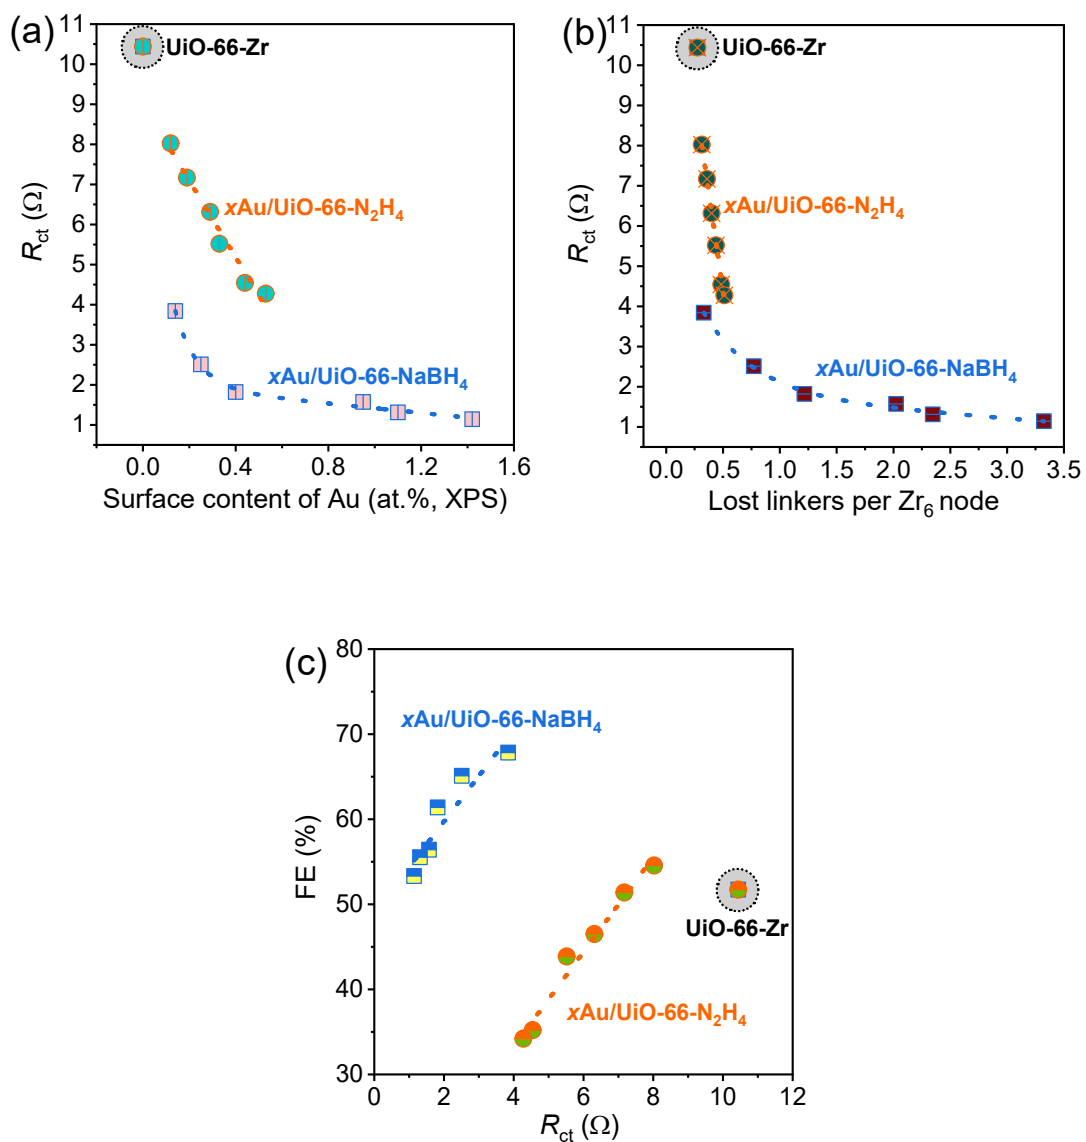

**Fig. S33.** (a) Relationships between surface contents of Au and  $R_{ct}$ ; (b) Relationships between lost linkers per  $\text{Zr}_6$  node and  $R_{ct}$ ; (c) Relationships between  $R_{ct}$  and FE, and those between  $R_{ct}$  and  $r_{\text{NH}_3}$ .

## Supporting Tables

**Table S1.** Core-level binding energy of surface species in the pristine UiO-66-Zr and  $x$ Au/UiO-66-NaBH<sub>4</sub>.

| Samples                      | N 1s (eV) |                  |                               | O 1s (eV) |        |                    | Au 4f (eV)        |                   | $\Delta BE_{\text{spin-orbit}}$<br>(eV) | Zr 3d (eV)        |                   | $\Delta BE_{\text{spin-orbit}}$<br>(eV) |
|------------------------------|-----------|------------------|-------------------------------|-----------|--------|--------------------|-------------------|-------------------|-----------------------------------------|-------------------|-------------------|-----------------------------------------|
|                              | -C-N      | -NH <sub>2</sub> | -NH <sub>3</sub> <sup>+</sup> | Zr-O-Zr   | Zr-OH  | A-H <sub>2</sub> O | 4f <sub>7/2</sub> | 4f <sub>5/2</sub> |                                         | 3d <sub>5/2</sub> | 3d <sub>3/2</sub> |                                         |
| The pristine UiO-66-Zr       | 399.12    | 400.19           | 401.43                        | 530.58    | 531.71 | 532.55             | -                 | -                 | -                                       | 182.97            | 185.34            | 2.37                                    |
| 1Au/UiO-66-NaBH <sub>4</sub> | 398.76    | 399.59           | 400.49                        | 530.40    | 531.58 | 532.57             | 84.30             | 87.92             | 3.62                                    | 182.82            | 185.19            | 2.37                                    |
| 2Au/UiO-66-NaBH <sub>4</sub> | 398.76    | 399.58           | 400.44                        | 530.28    | 531.57 | 532.37             | 84.20             | 87.85             | 3.65                                    | 182.77            | 185.14            | 2.37                                    |
| 3Au/UiO-66-NaBH <sub>4</sub> | 398.77    | 399.54           | 400.44                        | 530.15    | 531.51 | 532.22             | 84.17             | 87.83             | 3.66                                    | 182.73            | 185.10            | 2.37                                    |

|                                  |        |        |        |        |        |        |       |       |      |        |        |      |
|----------------------------------|--------|--------|--------|--------|--------|--------|-------|-------|------|--------|--------|------|
| 4Au/UiO-66-<br>NaBH <sub>4</sub> | 398.71 | 399.55 | 400.43 | 530.00 | 531.45 | 532.34 | 84.15 | 87.81 | 3.66 | 182.70 | 185.07 | 2.37 |
| 5Au/UiO-66-<br>NaBH <sub>4</sub> | 398.75 | 399.53 | 400.41 | 529.95 | 531.38 | 532.40 | 84.06 | 87.71 | 3.65 | 182.65 | 185.01 | 2.36 |
| 6Au/UiO-66-<br>NaBH <sub>4</sub> | 398.75 | 399.6  | 400.48 | 529.88 | 531.17 | 532.16 | 83.99 | 87.64 | 3.65 | 182.63 | 185.00 | 2.37 |

**Table S2.** Core-level binding energy of surface species in  $x\text{Au}/\text{UiO-66-N}_2\text{H}_4$ .

| Samples                                      | N 1s (eV) |                  |                               | O 1s (eV)   |        |                        | Au 4f (eV)        |                   | $\Delta BE_{\text{spin-orbit}}$<br>(eV) | Zr 3d (eV)        |                   | $\Delta BE_{\text{spin-orbit}}$<br>(eV) |
|----------------------------------------------|-----------|------------------|-------------------------------|-------------|--------|------------------------|-------------------|-------------------|-----------------------------------------|-------------------|-------------------|-----------------------------------------|
|                                              | -C-N      | -NH <sub>2</sub> | -NH <sub>3</sub> <sup>+</sup> | Zr-O-<br>Zr | Zr-OH  | A-<br>H <sub>2</sub> O | 4f <sub>7/2</sub> | 4f <sub>5/2</sub> |                                         | 3d <sub>5/2</sub> | 3d <sub>3/2</sub> |                                         |
| 1Au/UiO-66-<br>N <sub>2</sub> H <sub>4</sub> | 398.92    | 399.72           | 400.60                        | 530.69      | 531.72 | 532.68                 | 84.40             | 88.04             | 3.64                                    | 182.88            | 185.25            | 2.37                                    |
| 2Au/UiO-66-<br>N <sub>2</sub> H <sub>4</sub> | 398.91    | 399.76           | 400.69                        | 530.62      | 531.71 | 532.50                 | 84.37             | 88.02             | 3.65                                    | 182.87            | 185.24            | 2.37                                    |
| 3Au/UiO-66-<br>N <sub>2</sub> H <sub>4</sub> | 398.92    | 399.78           | 400.67                        | 530.64      | 531.69 | 532.61                 | 84.38             | 88.04             | 3.66                                    | 182.88            | 185.25            | 2.37                                    |
| 4Au/UiO-66-<br>N <sub>2</sub> H <sub>4</sub> | 398.90    | 399.73           | 400.64                        | 530.65      | 531.71 | 532.66                 | 84.36             | 88.02             | 3.66                                    | 182.86            | 185.23            | 2.37                                    |
| 5Au/UiO-66-                                  | 398.90    | 399.76           | 400.60                        | 530.63      | 531.69 | 532.58                 | 84.37             | 88.03             | 3.66                                    | 182.87            | 185.23            | 2.36                                    |

|                               |        |        |        |        |        |        |       |       |      |        |        |      |
|-------------------------------|--------|--------|--------|--------|--------|--------|-------|-------|------|--------|--------|------|
| N <sub>2</sub> H <sub>4</sub> |        |        |        |        |        |        |       |       |      |        |        |      |
| 6Au/UiO-66-                   |        |        |        |        |        |        |       |       |      |        |        |      |
| N <sub>2</sub> H <sub>4</sub> | 398.92 | 399.73 | 400.61 | 530.67 | 531.70 | 532.64 | 84.39 | 88.04 | 3.65 | 182.87 | 185.24 | 2.37 |

**Table S3.** Surface atomic compositions of the pristine UiO-66-Zr and  $x$ Au/UiO-66-NaBH<sub>4</sub> determined by XPS.

| Samples                      | N (at%) |                  |                               |       | O (at%) |       |                                  |                 |       | Au (at%) | Zr (at%) |
|------------------------------|---------|------------------|-------------------------------|-------|---------|-------|----------------------------------|-----------------|-------|----------|----------|
|                              | -C-N    | -NH <sub>2</sub> | -NH <sub>3</sub> <sup>+</sup> | Total | Zr-O-Zr | Zr-OH | A-H <sub>2</sub> O <sup>a)</sup> | Zr-O-Zr & Zr-OH | Total |          |          |
| The pristine UiO-66-Zr       | 3.40    | 1.76             | 0.91                          | 6.08  | 7.91    | 15.65 | 7.90                             | 23.56           | 31.46 | -        | 4.27     |
| 1Au/UiO-66-NaBH <sub>4</sub> | 2.53    | 1.54             | 1.17                          | 5.24  | 10.21   | 15.64 | 8.75                             | 25.85           | 34.60 | 0.14     | 5.25     |
| 2Au/UiO-66-NaBH <sub>4</sub> | 2.02    | 1.50             | 1.04                          | 4.56  | 9.41    | 16.62 | 9.05                             | 26.03           | 35.08 | 0.25     | 5.39     |
| 3Au/UiO-66-NaBH <sub>4</sub> | 1.92    | 1.17             | 0.96                          | 4.05  | 9.12    | 17.68 | 9.23                             | 26.80           | 36.03 | 0.40     | 5.73     |
| 4Au/UiO-66-NaBH <sub>4</sub> | 1.71    | 0.92             | 1.13                          | 3.76  | 8.89    | 19.4  | 9.67                             | 28.29           | 37.96 | 0.95     | 6.64     |
| 5Au/UiO-66-NaBH <sub>4</sub> | 1.32    | 0.87             | 1.07                          | 3.26  | 8.01    | 21.23 | 10.75                            | 29.24           | 39.99 | 1.10     | 7.16     |
| 6Au/UiO-66-NaBH <sub>4</sub> | 1.00    | 0.73             | 1.02                          | 2.75  | 7.78    | 23.90 | 12.99                            | 31.68           | 44.67 | 1.42     | 8.14     |

<sup>a)</sup> A-H<sub>2</sub>O refers to adsorbed H<sub>2</sub>O.

**Table S4.** Surface atomic compositions of  $x\text{Au}/\text{UiO}-66\text{-N}_2\text{H}_4$  determined by XPS.

| Samples                                  | N (at%) <sup>a</sup> |                  |                               |       | O (at%) <sup>a</sup> |       |                    |                    |       | Au (at%)    | Zr (at%) <sup>a</sup> |
|------------------------------------------|----------------------|------------------|-------------------------------|-------|----------------------|-------|--------------------|--------------------|-------|-------------|-----------------------|
|                                          | -C-N                 | -NH <sub>2</sub> | -NH <sub>3</sub> <sup>+</sup> | Total | Zr-O-Zr              | Zr-OH | A-H <sub>2</sub> O | Zr-O-Zr<br>& Zr-OH | Total |             |                       |
| 1Au/UiO-66-N <sub>2</sub> H <sub>4</sub> | 2.79                 | 1.39             | 1.30                          | 5.48  | 12.73                | 14.46 | 7.99               | 27.19              | 35.18 | <b>0.12</b> | 5.16                  |
| 2Au/UiO-66-N <sub>2</sub> H <sub>4</sub> | 2.47                 | 1.53             | 1.22                          | 5.21  | 11.89                | 14.22 | 8.52               | 26.11              | 34.63 | <b>0.19</b> | 5.20                  |
| 3Au/UiO-66-N <sub>2</sub> H <sub>4</sub> | 2.53                 | 1.45             | 1.29                          | 5.27  | 11.96                | 13.9  | 8.43               | 25.86              | 34.29 | <b>0.29</b> | 5.06                  |
| 4Au/UiO-66-N <sub>2</sub> H <sub>4</sub> | 2.55                 | 1.40             | 1.49                          | 5.44  | 11.97                | 14.19 | 7.86               | 26.16              | 34.02 | <b>0.33</b> | 5.15                  |
| 5Au/UiO-66-N <sub>2</sub> H <sub>4</sub> | 2.51                 | 1.32             | 1.31                          | 5.14  | 12.35                | 13.58 | 7.8                | 25.93              | 33.73 | <b>0.44</b> | 5.16                  |
| 6Au/UiO-66-N <sub>2</sub> H <sub>4</sub> | 2.65                 | 1.33             | 1.16                          | 5.14  | 11.88                | 13.29 | 8.29               | 25.17              | 33.46 | <b>0.53</b> | 5.04                  |

<sup>a</sup> The mean surface contents of -C-N, -NH<sub>2</sub>, -NH<sub>3</sub><sup>+</sup>, total N, Zr-O-Zr, Zr-OH, A-H<sub>2</sub>O (referred to adsorbed H<sub>2</sub>O), Zr-O-Zr & Zr-OH, total O and Zr are ~2.58, ~1.41, ~1.29, ~5.28, ~12.13, ~13.94, ~8.15, ~26.07, ~34.22 and ~5.13 at%, respectively, and the corresponding RSD values are ~4.6, ~5.5, ~8.6, ~2.8, ~2.8, ~3.2, ~3.8, ~2.5, ~1.8% and ~1.2%, respectively. But, the changes of the surface contents of Au are more significant (mean:



~0.32 at%, RSD: ~48%).

**Table S5.** XPS valence band binding energy (-4.5~15 eV) in the pristine UiO-66-Zr, *x*Au/UiO-66-NaBH<sub>4</sub> and *x*Au/UiO-66-N<sub>2</sub>H<sub>4</sub>.

| Samples                          | Au<br>Au 5d <sub>5/2</sub><br>(eV) | Au<br>5d <sub>3/2</sub><br>(eV) | $\Delta BE_{\text{spin-orbit}}$ (Au<br>5d <sub>3/2</sub> - Au 5d <sub>5/2</sub> ,<br>eV) | $\Delta BE_{\text{O-Au}}$ (O 2p<br>non-bonding-Au<br>5d <sub>5/2</sub> , eV) | O 2p non-<br>bonding (eV) | O 2p<br>bonding<br>(eV) | C 2p<br>(3e2g+1a2u,<br>eV) | C 2p<br>(3e1u+1b2u,<br>eV) |
|----------------------------------|------------------------------------|---------------------------------|------------------------------------------------------------------------------------------|------------------------------------------------------------------------------|---------------------------|-------------------------|----------------------------|----------------------------|
| The pristine                     | --                                 | --                              | --                                                                                       | --                                                                           |                           |                         |                            |                            |
| UiO-66-Zr                        |                                    |                                 |                                                                                          |                                                                              | 4.73                      | 6.86                    | 10.14                      | 12.98                      |
| 1Au/UiO-66-<br>NaBH <sub>4</sub> | 3.71                               | 6.12                            | 2.41                                                                                     | 1.02                                                                         | 4.73                      | 7.39                    | 10.05                      | 12.75                      |
| 2Au/UiO-66-<br>NaBH <sub>4</sub> | 3.5                                | 6.15                            | 2.65                                                                                     | 1.23                                                                         | 4.73                      | 7.38                    | 10.1                       | 12.63                      |
| 3Au/UiO-66-<br>NaBH <sub>4</sub> | 3.25                               | 6.1                             | 2.85                                                                                     | 1.41                                                                         | 4.66                      | 7.35                    | 10.07                      | 12.74                      |
| 4Au/UiO-66-<br>NaBH <sub>4</sub> | 3.04                               | 6.14                            | 3.1                                                                                      | 1.53                                                                         | 4.57                      | 7.31                    | 10.06                      | 12.55                      |

NaBH<sub>4</sub>

5Au/UiO-66-

|                   |      |      |      |      |     |     |       |       |
|-------------------|------|------|------|------|-----|-----|-------|-------|
| NaBH <sub>4</sub> | 2.83 | 5.99 | 3.16 | 1.57 | 4.4 | 7.2 | 10.03 | 12.53 |
|-------------------|------|------|------|------|-----|-----|-------|-------|

6Au/UiO-66-

|                   |      |      |      |      |     |      |      |       |
|-------------------|------|------|------|------|-----|------|------|-------|
| NaBH <sub>4</sub> | 2.75 | 5.96 | 3.21 | 1.55 | 4.3 | 7.23 | 9.75 | 12.49 |
|-------------------|------|------|------|------|-----|------|------|-------|

1Au/UiO-66-

|                               |      |      |      |      |      |      |       |       |
|-------------------------------|------|------|------|------|------|------|-------|-------|
| N <sub>2</sub> H <sub>4</sub> | 3.77 | 6.04 | 2.27 | 0.97 | 4.74 | 7.38 | 10.17 | 12.98 |
|-------------------------------|------|------|------|------|------|------|-------|-------|

2Au/UiO-66-

|                               |      |      |      |      |      |      |       |       |
|-------------------------------|------|------|------|------|------|------|-------|-------|
| N <sub>2</sub> H <sub>4</sub> | 3.55 | 6.09 | 2.54 | 1.21 | 4.76 | 7.39 | 10.12 | 12.90 |
|-------------------------------|------|------|------|------|------|------|-------|-------|

3Au/UiO-66-

|                               |      |      |      |      |      |      |       |       |
|-------------------------------|------|------|------|------|------|------|-------|-------|
| N <sub>2</sub> H <sub>4</sub> | 3.33 | 6.11 | 2.78 | 1.40 | 4.73 | 7.39 | 10.25 | 12.88 |
|-------------------------------|------|------|------|------|------|------|-------|-------|

4Au/UiO-66-

|                               |      |      |      |      |      |     |       |      |
|-------------------------------|------|------|------|------|------|-----|-------|------|
| N <sub>2</sub> H <sub>4</sub> | 3.26 | 6.14 | 2.88 | 1.49 | 4.75 | 7.3 | 10.11 | 12.8 |
|-------------------------------|------|------|------|------|------|-----|-------|------|

---

---

5Au/UiO-66-

|                               |      |      |      |      |      |      |       |       |
|-------------------------------|------|------|------|------|------|------|-------|-------|
| N <sub>2</sub> H <sub>4</sub> | 3.19 | 6.13 | 2.94 | 1.47 | 4.66 | 7.44 | 10.21 | 12.69 |
|-------------------------------|------|------|------|------|------|------|-------|-------|

6Au/UiO-66-

|                               |      |      |      |      |      |      |       |       |
|-------------------------------|------|------|------|------|------|------|-------|-------|
| N <sub>2</sub> H <sub>4</sub> | 3.19 | 6.03 | 2.84 | 1.45 | 4.64 | 7.34 | 10.08 | 12.86 |
|-------------------------------|------|------|------|------|------|------|-------|-------|

---

**Table S6.** Summary of the recently-developed catalysts toward NRR to NH<sub>3</sub>.

| Catalyst                                         | $r_{NH_3}$<br>( $\mu\text{g h}^{-1} \text{mg}_{\text{cat}}^{-1}$ ) | FE (%)       | Electrolyte                               | Potential<br>(V vs. RHE)           | Loading<br>( $\text{mg cm}^{-2}$ ) | Refs.            |
|--------------------------------------------------|--------------------------------------------------------------------|--------------|-------------------------------------------|------------------------------------|------------------------------------|------------------|
| <b>5Au/UiO-66-NaBH<sub>4</sub></b>               | <b>163.33</b>                                                      | <b>55.52</b> | <b>0.1 M Na<sub>2</sub>SO<sub>4</sub></b> | <b>-0.3</b>                        | <b>0.5</b>                         | <b>This work</b> |
| HT Au@MOF                                        | 49.5                                                               | 60.9         | 0.1 M Na <sub>2</sub> SO <sub>4</sub>     | -0.3                               | N.A.                               | [1]              |
| Ru SAs/N-C                                       | 120.9                                                              | 29.6         | 0.05 M H <sub>2</sub> SO <sub>4</sub>     | -0.2                               | 0.255                              | [2]              |
| Ru SAs/g-C <sub>3</sub> N <sub>4</sub>           | 23                                                                 | 8.3          | 0.5 M NaOH                                | 0.05                               | N.A.                               | [3]              |
| Rh@SnO <sub>2</sub>                              | 149                                                                | 11.69        | 0.05 M H <sub>2</sub> SO <sub>4</sub>     | -0.35                              | 0.05                               | [4]              |
| OVs-Pd <sub>3</sub> Pb-2                         | 88.3                                                               | 41.1         | 0.1 M Li <sub>2</sub> SO <sub>4</sub>     | -0.05                              | N.A.                               | [5]              |
| Fe <sub>2</sub> O <sub>3</sub> @MoS <sub>2</sub> | 112.15                                                             | 8.62         | 0.1 M Na <sub>2</sub> SO <sub>4</sub>     | -0.6 for $r_{NH_3}$<br>-0.4 for FE | 0.3                                | [6]              |
| C@YSZ                                            | 24.60                                                              | 8.2          | 0.1 M Na <sub>2</sub> SO <sub>4</sub>     | -0.5                               | 0.2                                | [7]              |

|                        |        |       |                                                   |                                      |      |      |
|------------------------|--------|-------|---------------------------------------------------|--------------------------------------|------|------|
| Ni-Fe@MoS <sub>2</sub> | 128.17 | 11.34 | 0.1 M Na <sub>2</sub> SO <sub>4</sub><br>(@40 °C) | -0.3                                 | 0.71 | [8]  |
| C-BN                   | 44.59  | 13.27 | 0.1 M Na <sub>2</sub> SO <sub>4</sub>             | -0.9 for $r_{NH_3}$<br>-0.7 for FE   | 0.24 | [9]  |
| Zn <sup>1</sup> N-C    | 16.1   | 11.8  | 0.1 M KOH                                         | -0.3                                 | N.A. | [10] |
| Bi@C                   | 4.22   | 15.1  | 0.1 M Na <sub>2</sub> SO <sub>4</sub>             | -0.6 for $r_{NH_3}$<br>-0.4 for FE   | 0.25 | [11] |
| NC/Bi SAs/TiN/CC       | 76.15  | 24.6  | 0.1 M Na <sub>2</sub> SO <sub>4</sub>             | -0.8 for $r_{NH_3}$<br>-0.5 for FE   | N.A. | [12] |
| Rh <sub>2</sub> P@NPC  | 37.5   | 7.64  | 0.05 M H <sub>2</sub> SO <sub>4</sub>             | -0.25 for $r_{NH_3}$<br>-0.05 for FE | 0.2  | [13] |
| FeMoPPc                | 36.33  | 20.62 | 0.1 M KOH                                         | -0.3                                 | 0.5  | [14] |

## Supporting references

- 1 H.M. He, Q.Q. Zhu, Y. Yan, H.W. Zhang, Z.Y. Han, H.M. Sun, J. Chen, C.P. Li, Z.H. Zhang and M. Du, Metal-organic framework supported Au nanoparticles with organosilicone coating for high-efficiency electrocatalytic N<sub>2</sub> reduction to NH<sub>3</sub>, *Appl. Catal. B*, 2022, **302**, 120840.
- 2 Z. Geng, Y. Liu, X. Kong, P. Li, K. Li, Z. Liu, J. Du, M. Shu, R. Si and J. Zeng, Achieving a record-high yield rate of  $120.9 \mu\text{g}_{\text{NH}_3} \text{mg}_{\text{cat.}}^{-1} \text{h}^{-1}$  for N<sub>2</sub> electrochemical reduction over Ru single-atom catalysts, *Adv. Mater.*, 2018, **30**, 1803498.
- 3 B. Yu, H. Li, J. White, S. Donne, J.B. Yi, S. Xi, Y. Fu, G. Henkelman, H. Yu, Z.L. Chen and T.Y. Ma, Tuning the catalytic preference of ruthenium catalysts for nitrogen reduction by atomic dispersion, *Adv. Funct. Mater.*, 2020, **30**, 1905665.
- 4 Y.Q. Liu, L. Huang, Y.X. Fang, X.Y. Zhu, J.L. Nan and S.J. Dong, Interfacial electron regulation of Rh atomic layer-decorated SnO<sub>2</sub> heterostructures for enhancing electrocatalytic nitrogen reduction, *ACS Appl. Mater. Interfaces*, 2022, **14**, 12304-12313.
- 5 Z.C. Wang, J. Liu, X.K. Wu, N.Z. Nie, D. Zhang, H.D. Li, H. Zhao, J.P. Lai and L. Wang, Engineering ordered vacancies and atomic arrangement over the intermetallic PdM/CNT (M=Pb,Sn,In) nanocatalysts for synergistically promoting electrocatalysis N<sub>2</sub> fixation, *Appl. Catal. B*, 2022, **314**, 121465.
- 6 C.Q. Ma, D. Liu, Y.L. Zhang, J.Y. Lee, J. Tian, B.P. Liu and S.H. Yan, MOF-derived Fe<sub>2</sub>O<sub>3</sub>@MoS<sub>2</sub>: An efficient electrocatalyst for ammonia synthesis under mild conditions, *Chem. Eng. J.*, 2022, **430**, 132694.

- 7 S.J. Luo, X.M. Li, M.Y. Wang, X. Zhang, W.G. Gao, S.D. Su, G.W. Liu and M. Luo, Long-term electrocatalytic N<sub>2</sub> fixation by MOF-derived Y-stabilized ZrO<sub>2</sub>: insight into the deactivation mechanism, *J. Mater. Chem. A*, 2020, **8**, 5647-5654.
- 8 L.B. Zeng, X.Y. Li, S. Chen, J.L. Wen, W. Huang and A. Chen, Unique hollow Ni-Fe@MoS<sub>2</sub> nanocubes with boosted electrocatalytic activity for N<sub>2</sub> reduction to NH<sub>3</sub>, *J. Mater. Chem. A*, 2020, **8**, 7339-7349.
- 9 C.Q. Ma, Y.L. Zhang, S.H. Yan and B.P. Liu, Carbon-doped boron nitride nanosheets: A high-efficient electrocatalyst for ambient nitrogen reduction, *Appl. Catal. B*, 2022, **315**, 121574.
- 10 Y. Kong, Y. Li, X.H. Sang, B. Yang, Z.J. Li, S.X. Zheng, Q.H. Zhang, S.Y. Yao, X.X. Yang, L.C. Lei, S.D. Zhou, G. Wu and Y. Hou, Atomically dispersed zinc(I) active sites to accelerate nitrogen reduction kinetics for ammonia electrosynthesis, *Adv. Mater.*, 2022, **34**, 2103548.
- 11 Y.C. Wan, H.J. Zhou, M.Y. Zheng, Z.H. Huang, F.Y. Kang, J. Li and R.T. Lv, Oxidation state modulation of bismuth for efficient electrocatalytic nitrogen reduction to ammonia, *Adv. Funct. Mater.*, 2021, **31**, 2100300.
- 12 Z.C. Xi, K. Shi, X. Xu, P. Jing, B.C. Liu, R. Gao and J. Zhang, Boosting nitrogen reduction reaction via electronic coupling of atomically dispersed bismuth with titanium nitride nanorods, *Adv. Sci.*, 2022, **9**, 2104245.
- 13 J.F. Su, H.Y. Zhao, W.W. Fu, W. Tian, X.H. Yang, H.J. Zhang, F.L. Ling and Y. Wang, Fine rhodium phosphides nanoparticles embedded in N, P dual-doped carbon film: New efficient electrocatalysts for ambient nitrogen fixation, *Appl.*



*Catal. B*, 2020, **265**, 118589.

- 14 Y.J. Wang, W.Z. Cheng, P.F. Yuan, G.G. Yang, S.C. Mu, J.L. Liang, H.C. Xia, K. Guo, M.L. Liu, S.Y. Zhao, G. Qu, B.A. Lu, Y.F. Hu, J.S. Hu and J.N. Zhang, Boosting nitrogen reduction to ammonia on FeN<sub>4</sub> sites by atomic spin regulation, *Adv. Sci.*, 2021, **8**, 2102915.
